# Supplementary material for: Temperature-controlled helical inversion of asymmetric triphenylamine-based supramolecular polymers; difference of handedness at the micro- and macroscopic levels
Source: Royal Society of Chemistry journal article supplement (doi:10.1039/c9qo00051h), 2019-01-01
Supplement: c9qo00051h1.pdf [file c9qo00051h1.pdf]

## Electronic Supplementary Information

### Temperature-controlled helical inversion of asymmetric triphenylamine-based supramolecular polymers; difference of handedness at the micro- and the macroscopic levels

Misun Go,<sup>a</sup> Heekyoung Choi,<sup>a</sup> Ka Young Kim,<sup>a</sup> Cheol Joo Moon,<sup>a</sup> Yeonweon Choi,<sup>b</sup> Hiroyuki Miyake,<sup>c</sup> Shim Sung Lee,<sup>a</sup> Sung Ho Jung,<sup>a</sup> Myong Yong Choi<sup>a\*</sup> and Jong Hwa Jung<sup>a\*</sup>

<sup>a</sup>Department of Chemistry and Research Institute of Natural Sciences, Gyeongsang National University, Jinju 52828, Republic of Korea.

<sup>b</sup>Accident Prevention and Assessment Division 2, National Institute of Chemical Safety, Daejeon 34111, Korea.

<sup>c</sup>Department of Chemistry, Graduate School of Science, Osaka City University, Osaka 558-8585, Japan.

\*E-mail: [jonghwa@gnu.ac.kr](mailto:jonghwa@gnu.ac.kr) (Jong Hwa Jung)

# Table of Contents

|                                       |    |
|---------------------------------------|----|
| <b>1. Experimental Section</b> .....  | 3  |
| <b>2. Scheme</b> .....                | 5  |
| <b>3. Supplementary Figures</b> ..... | 6  |
| <b>4. Table</b> .....                 | 22 |
| <b>5. Synthesis of Chain</b> .....    | 26 |
| <b>6. Synthesis of TPAs</b> .....     | 28 |
| <b>7. Analytic Data</b> .....         | 31 |
| <b>8. References</b> .....            | 55 |

# Experimental Section

## 1. Materials

Unless otherwise noted, chemical reagents and solvents were purchased from commercial suppliers (Tokyo Chemical Industry (TCI) and Sigma-Aldrich) and used without further purification.

## 2. Instruments and Methods (Characterization)

The  $^1\text{H}$  and  $^{13}\text{C}$  NMR spectra were recorded on a Bruker DRX 300 spectrometer, and mass spectroscopy was performed on a JEOL JMS-700 mass spectrometer. A UV–visible spectrophotometer (Thermo Evolution 600) was used to obtain the absorption spectra. IR spectra were obtained using KBr pellets, in the range  $400\text{--}4000\text{ cm}^{-1}$ , with a Shimadzu FTIR 8400S instrument. Fluorescence spectra were obtained using a RF-5301PC spectrophotometer.

### 2.1 AFM Observation

AFM imaging was performed with an XE-100 instrument and a PPP-NCHR 10 M cantilever (Park Systems). Samples of supramolecular polymer for AFM were prepared by spin-coating (1,500 rpm) onto freshly cleaved muscovite mica. Images were recorded in a non-contact mode in the air at RT with a resolution of  $1,024 \times 1,024$  pixels, using moderate scan rates (0.3 Hz).

### 2.2 Circular Dichroism (CD) Studies

CD spectra were recorded on a Jasco J-815 CD spectrophotometer. CD spectra were recorded over the range of 280–400 nm using a quartz cell with a 1 cm path length. Scans were taken at a rate of 100 nm/min with a sampling interval of 1.0 nm and a response time of 1 s.

### 2.3 Self-Assembled Supramolecular Polymer Preparation

The self-assembled supramolecular polymer (TPAs) were used as an example to describe the preparation procedure. TPAs ( $8 \times 10^{-5}\text{ M}$ ) were suspended in a septum-capped 5.0 mL glass vial and heated ( $\sim 100\text{ }^\circ\text{C}$ ) until a homogeneous solution was obtained. The solution was sonicated in a bath sonicator for a few seconds and cooled to ambient temperature to afford the self-assembled supramolecular polymer.

## 2.4 DFT

Quantum chemical calculations were performed with the Gaussian 09 program<sup>S1</sup>. Computations of **TPA-1** and **TPA-3** are so challenging for the full geometry optimization that the pentamers of **TPA-1** and **TPA-3** have been used in the theoretical calculations of current studies to reduce the computational cost. Unless otherwise specified, the calculations regarding **TPA-1** and **TPA-3** reported hereafter were performed out with the pentamers of **TPA-1** and **TPA-3** by employing density functional theory (DFT) Becke's three parameter hybrid functions with the nonlocal correlation of Lee–Yang–Parr (B3LYP) method in the absence of symmetry constraints. The energies include zero-point energy corrections using the B3LYP/6-31G levels of theory. Further details about the calculations are reported in the Supporting Information.

## 2.5 VCD

VCD and IR spectra were measured on an FT/IR-4100 spectrometer with VFT-4000 attachment (JASCO, Japan) using KBr pellets. The KBr pellet (13 mm diameter) of each sample was inserted between two BaF<sub>2</sub> plates together with 100  $\mu$ m teflon spacer. The signal was accumulated by 2,000 scans (ca. 22 min) at every 90 degrees and averaged. The resolution was 4  $\text{cm}^{-1}$ .

## 2.6 Linear dichroism (LD) Studies

Linear dichroism (LD) spectra were recorded on a Jasco J-815 Spectropolarimeter (150-L Type). Temperature-dependent spectra were recorded over the range of 280–500 nm using a quartz cell with a 1 cm path length. Scans were taken at a rate of 100 nm/min with a sampling interval of 1.0 nm and a response time of 1 s.

# Scheme

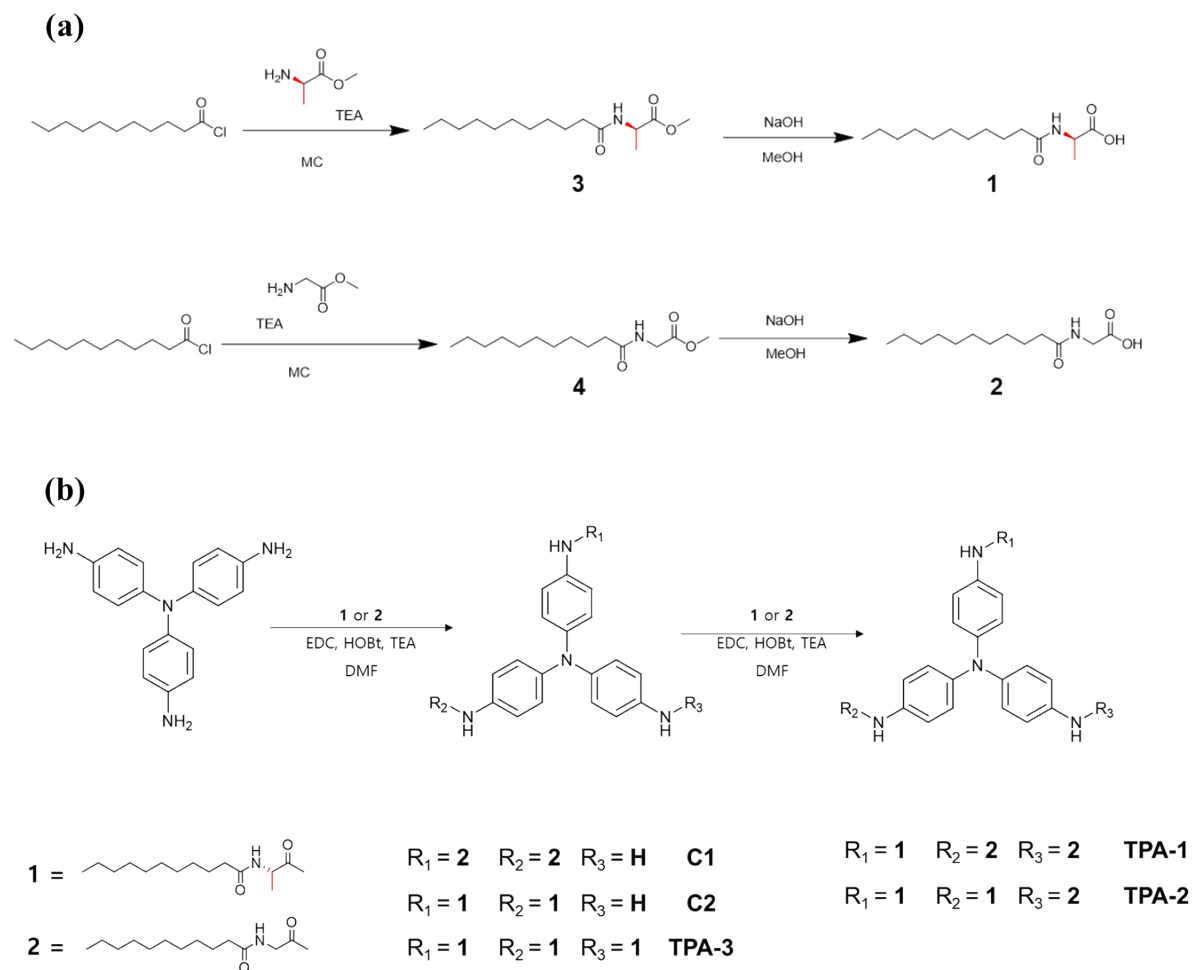

**Scheme S1.** Synthetic methods for (a) **1**, **2** and (b) **TPAs**.

## Supplementary Figures

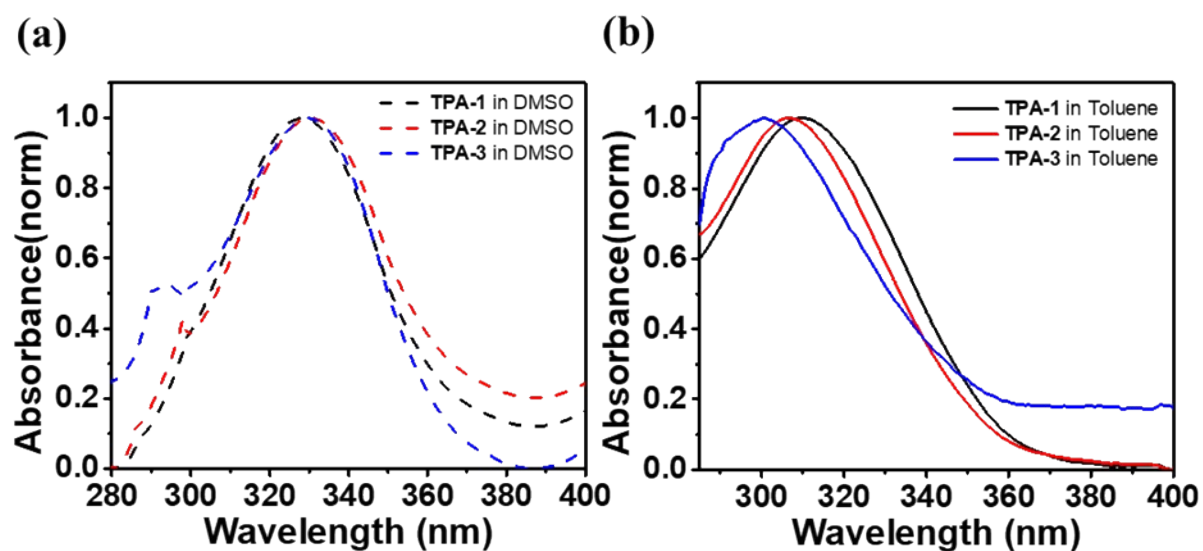

**Fig. S1** UV-Vis absorption spectra of TPA-1 (black line and black dash), TPA-2 (red line and red dash) and TPA-3 (blue line and blue dash) in (a) DMSO and (b) toluene at 298 K (concentrations of all samples were  $8.0 \times 10^{-5}$  M).

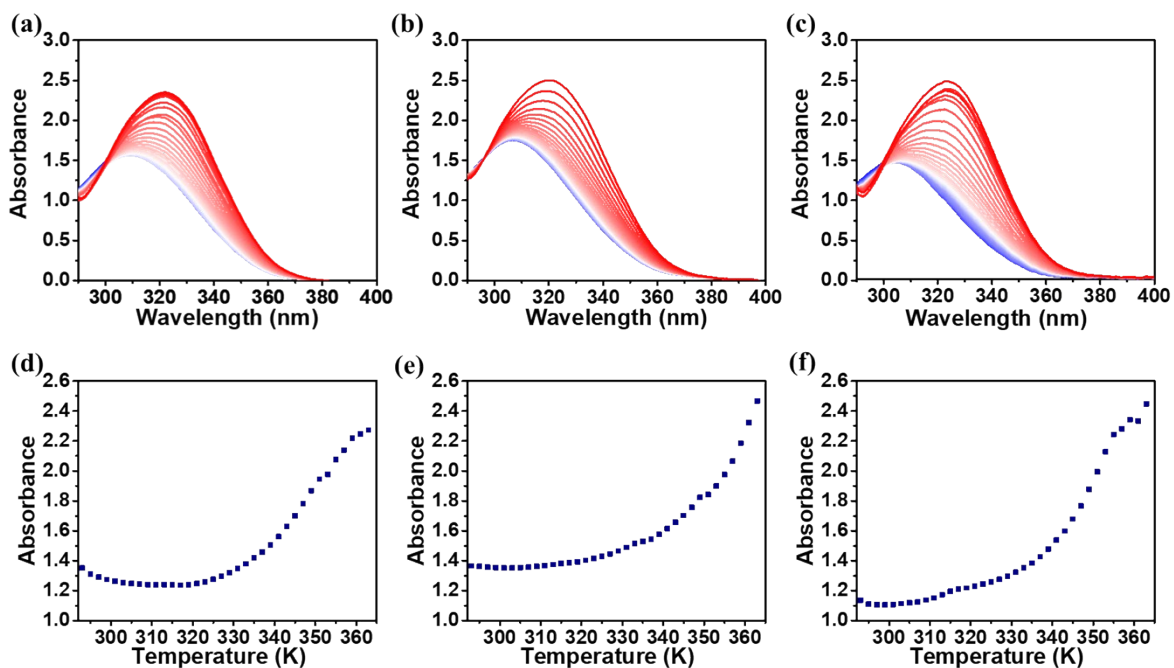

**Fig. S2** Temperature-dependent electronic absorption spectra of (a) **TPA-1**, (b) **TPA-2** and (c) **TPA-3** in toluene at  $8.0 \times 10^{-5}$  M (electronic absorption spectra were measured every 2 K in the range from 293 K (blue line) to 363 K (red line)). Plots of electronic absorption intensities at the absorption maxima ( $\lambda = 320$  nm) of (d) **TPA-1**, (e) **TPA-2** and (f) **TPA-3** as a function of temperatures.

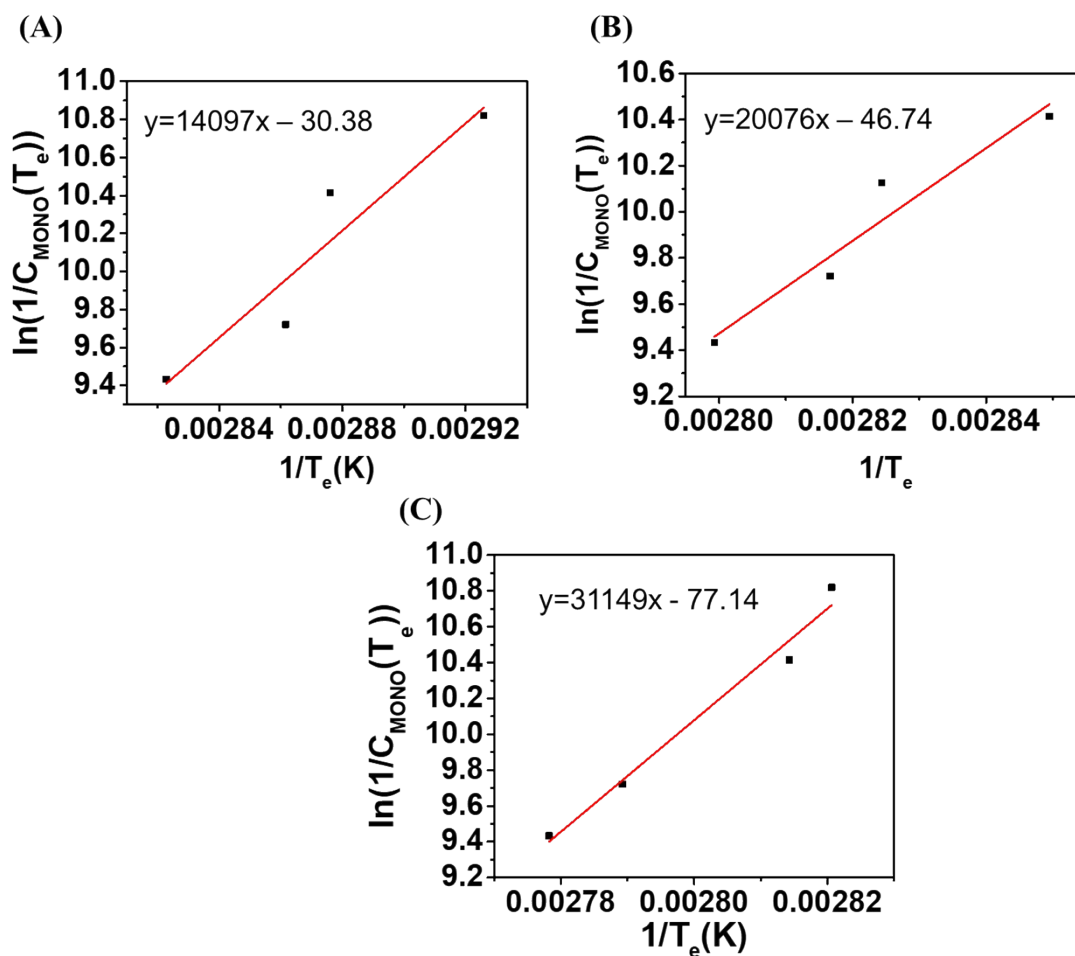

**Fig. S3** Natural logarithm of the reciprocal of concentration ( $C_T$ ) as a function of the reciprocal of elongation temperature  $T_e$  (van't Hoff plot) obtained through the heating experiments of (A) TPA-1, (B) TPA-2 and (C) TPA-3 in toluene under different concentrations.<sup>S2-S5</sup>



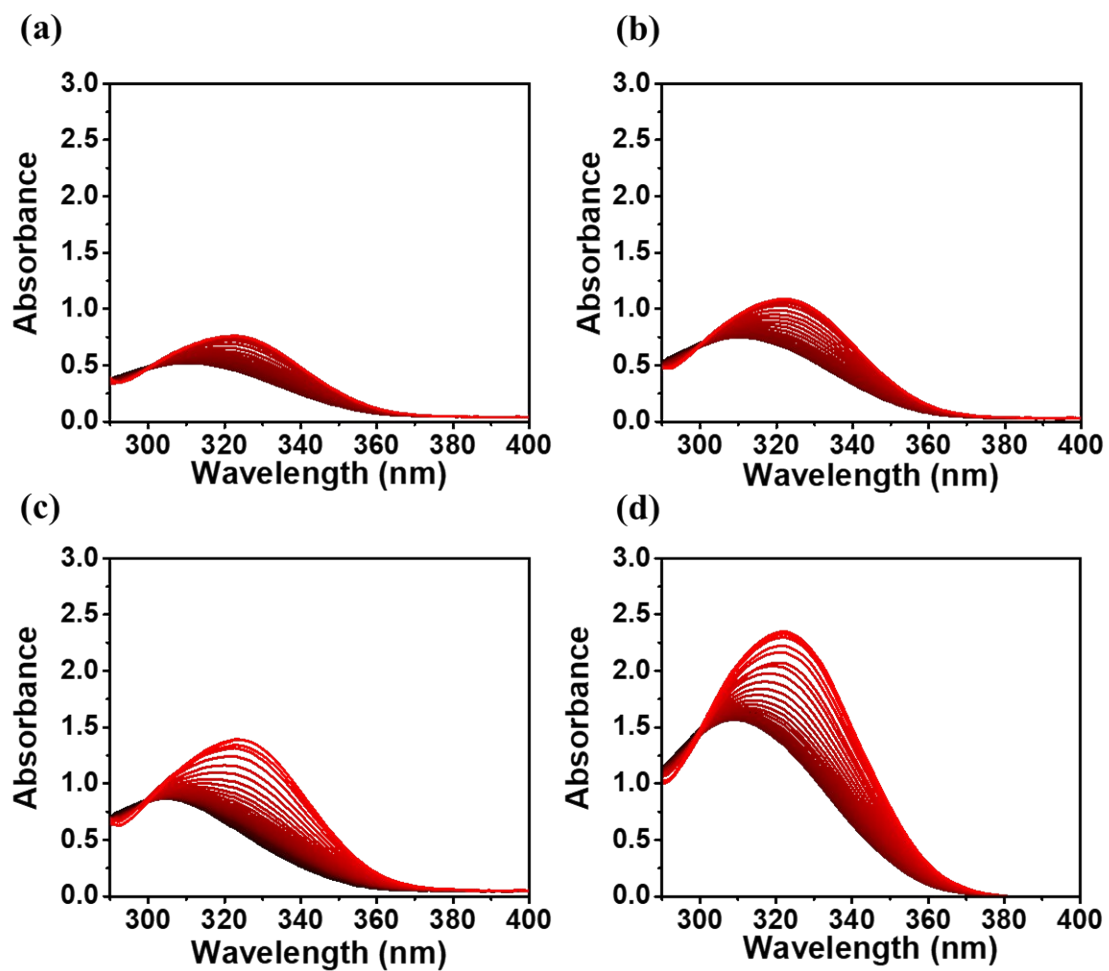

**Fig. S4** Temperature-dependent UV-Vis spectra of supramolecular polymer **TPA-1** prepared at (a)  $2 \times 10^{-5}$  M, (b)  $3 \times 10^{-5}$  M, (c)  $6 \times 10^{-5}$  M, and (d)  $8 \times 10^{-5}$  M in toluene (from 293 K to 363 K).

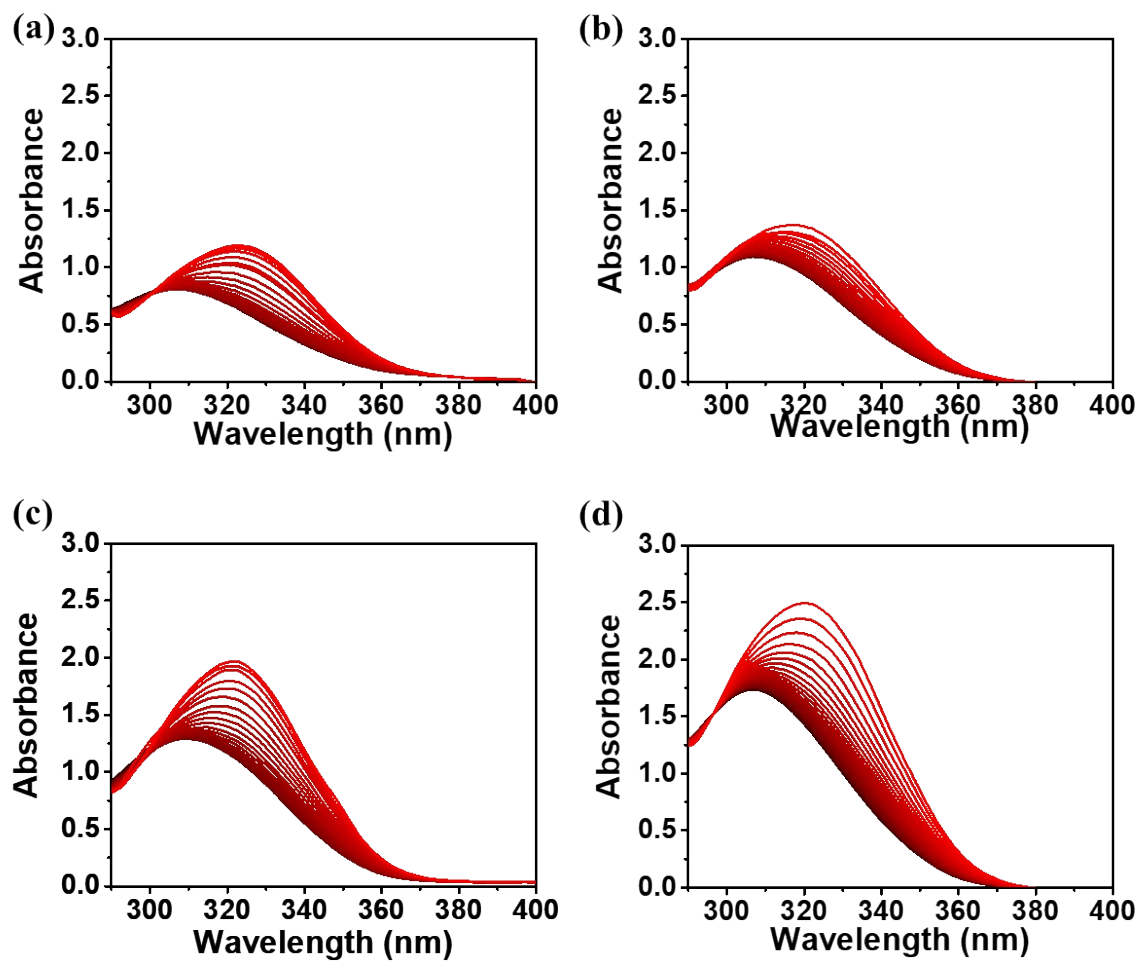

**Fig. S5** Temperature-dependent UV-Vis spectra of supramolecular polymer TPA-2 prepared at (a)  $3 \times 10^{-5}$  M, (b)  $4 \times 10^{-5}$  M, (c)  $6 \times 10^{-5}$  M and (d)  $8 \times 10^{-5}$  M in toluene (from 293 K to 363 K).

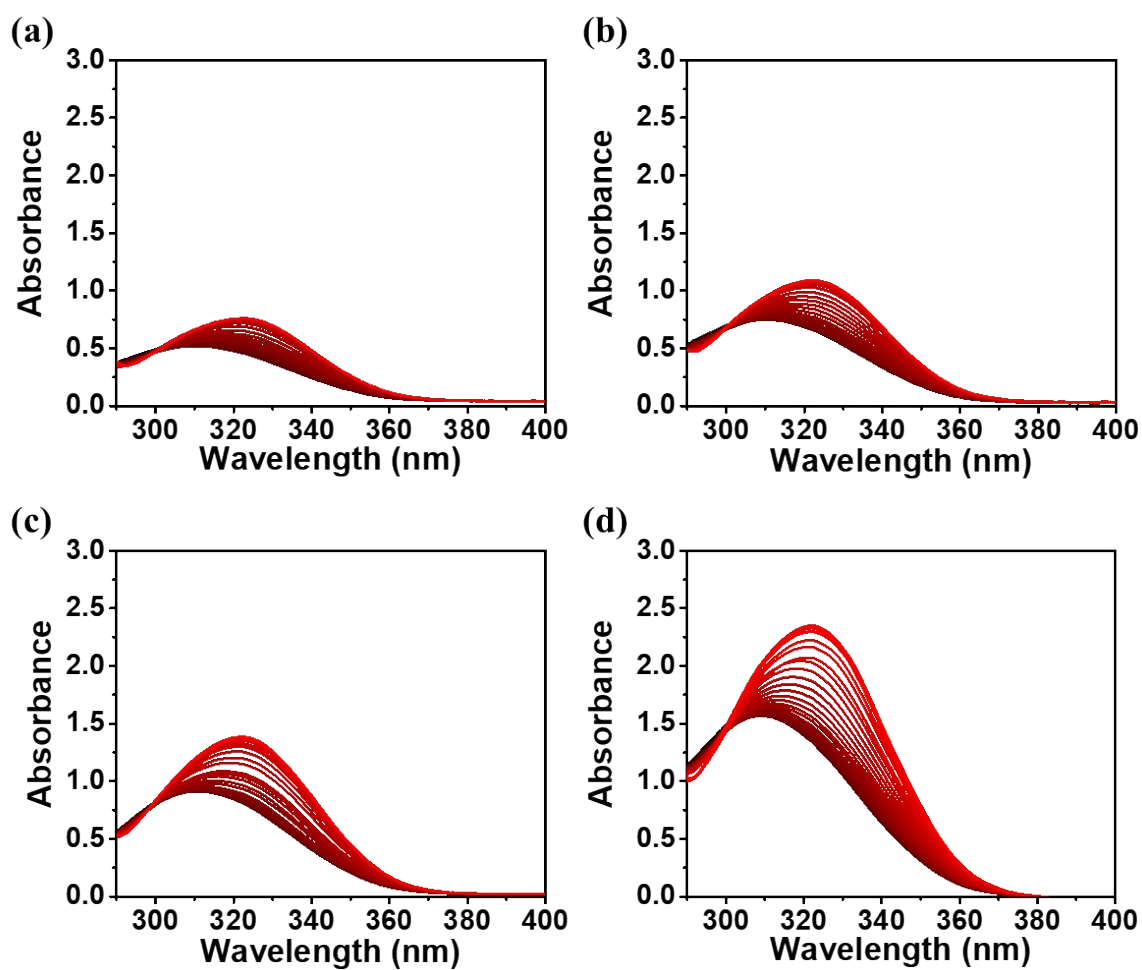

**Fig. S6** Temperature-dependent UV-Vis spectra of supramolecular polymer **TPA-3** prepared at (a)  $2 \times 10^{-5}$  M, (b)  $3 \times 10^{-5}$  M, (c)  $6 \times 10^{-5}$  M, and (d)  $8 \times 10^{-5}$  M in toluene (from 293 K to 363 K).

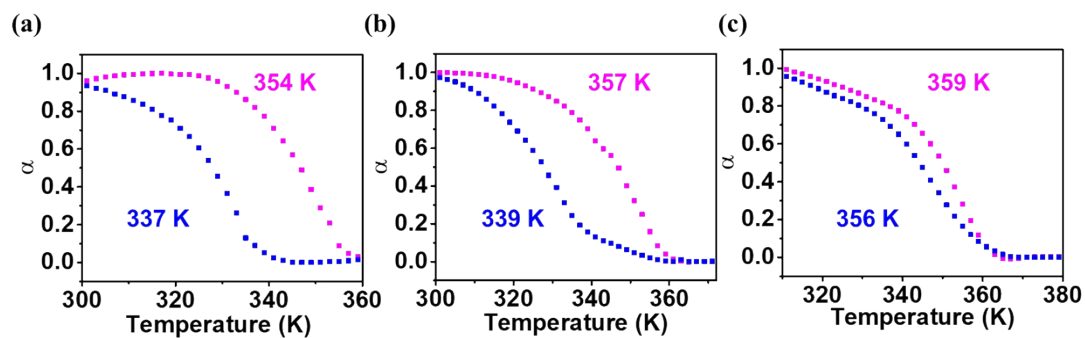

**Fig. S7** Temperature-dependent degree of (a) TPA-1, (b) TPA-2 and (c) TPA-3 ( $\alpha_{Agg}$ ) calculated from the apparent absorption coefficients at  $\lambda = 320$  nm observed in the cooling (blue) and heating (pink) processes in toluene.<sup>S6, S7</sup>

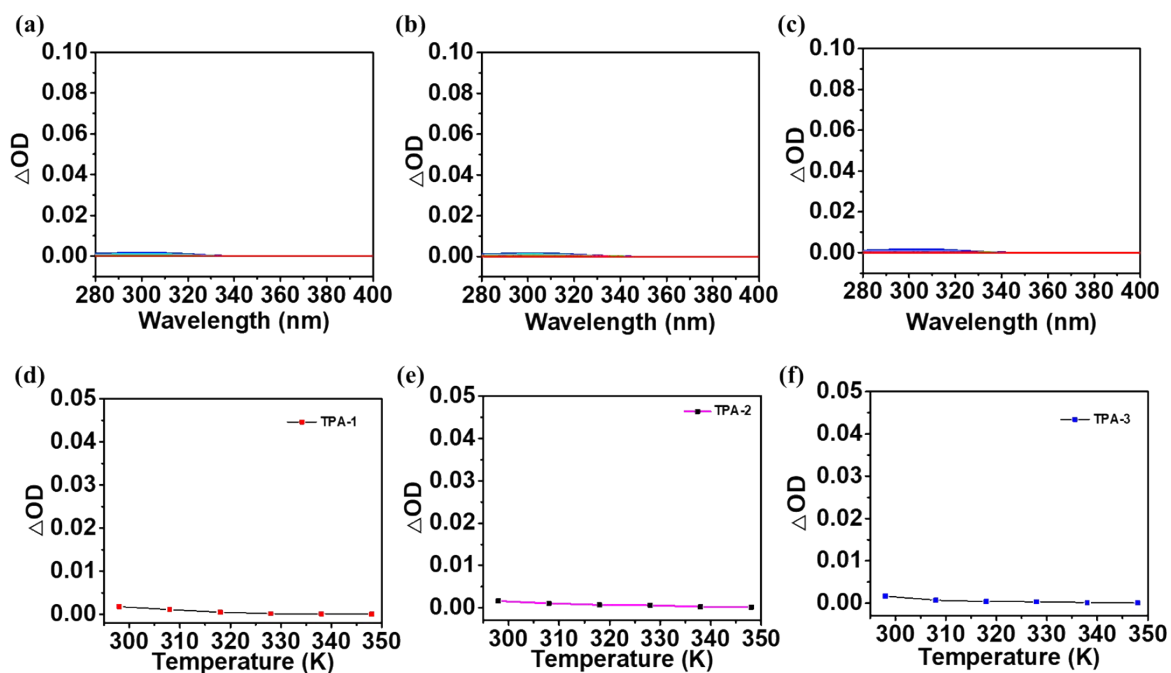

**Fig. S8** Temperature-dependent LD spectra of supramolecular polymer (a) TPA-1, (b) TPA-2 and (c) TPA-3 in toluene.<sup>S8-S10</sup> Plot for LD intensity of (d) TPA-1, (e) TPA-2 and (f) TPA-3 against temperature.

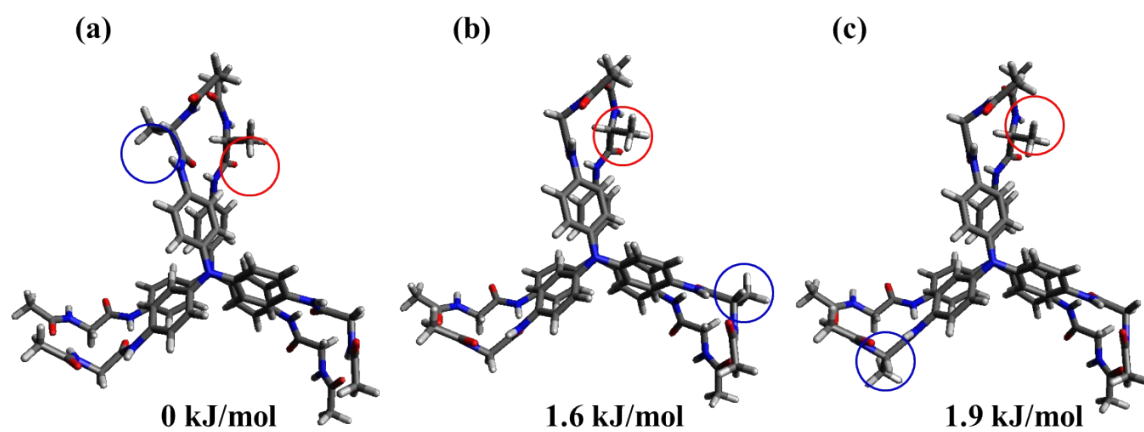

**Fig. S9** DFT calculation of dimeric structures of (a) TPA-1(AA), (b) TPA-1(AG) and TPA-1(GA).

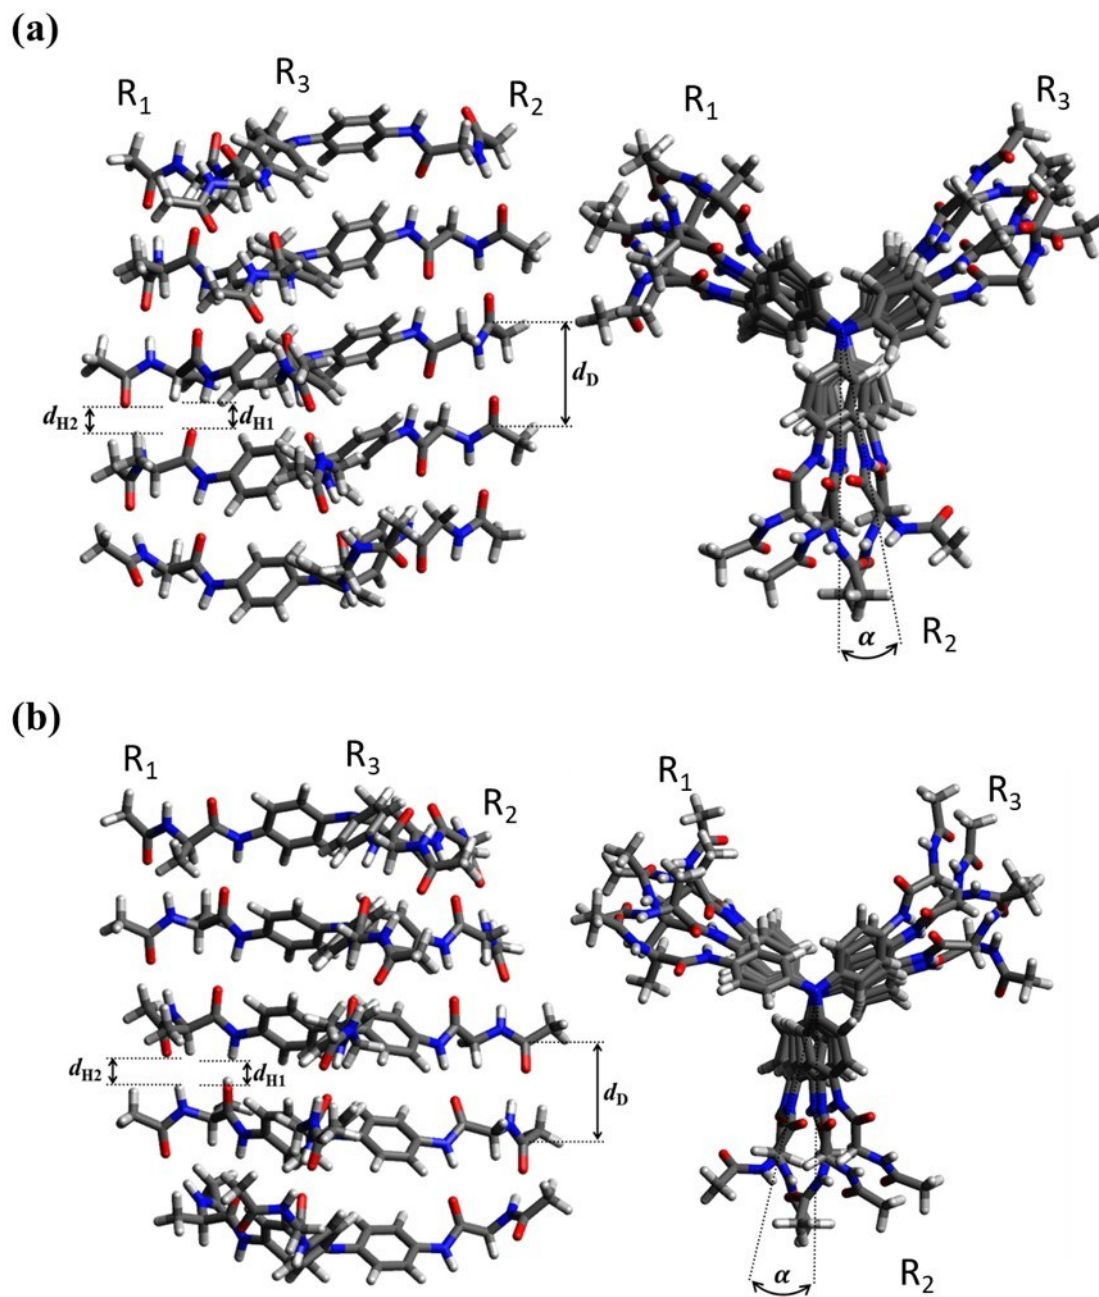

**Fig. S10** Three-dimensional structures and hydrogen bond length ( $d_H$ ) and interdiscotic angle ( $\alpha$ ) and interdiscotic distance ( $d_D$ ) of TPA-1(AA) for (a) anti-parallel (2:1) and (b) parallel (3:0) conformations.

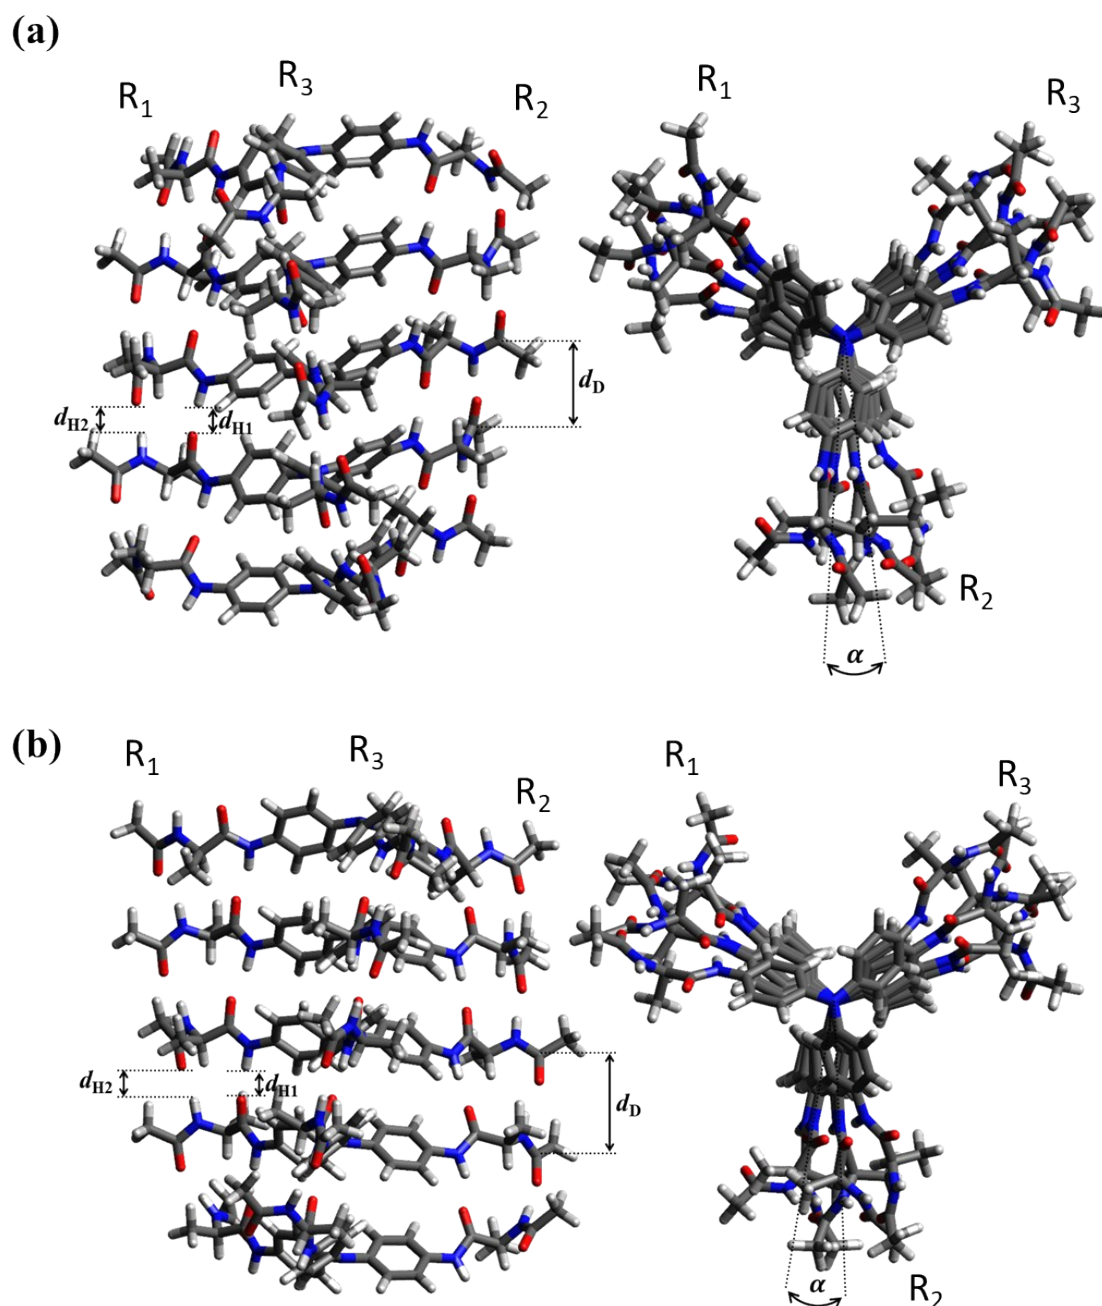

**Fig. S11** Three-dimensional structures and hydrogen bond length ( $d_H$ ) and interdiscotic angle ( $\alpha$ ) and interdiscotic distance ( $d_D$ ) of **TPA-3(AA)** for (a) anti-parallel (2:1) and (b) parallel (3:0) conformations.



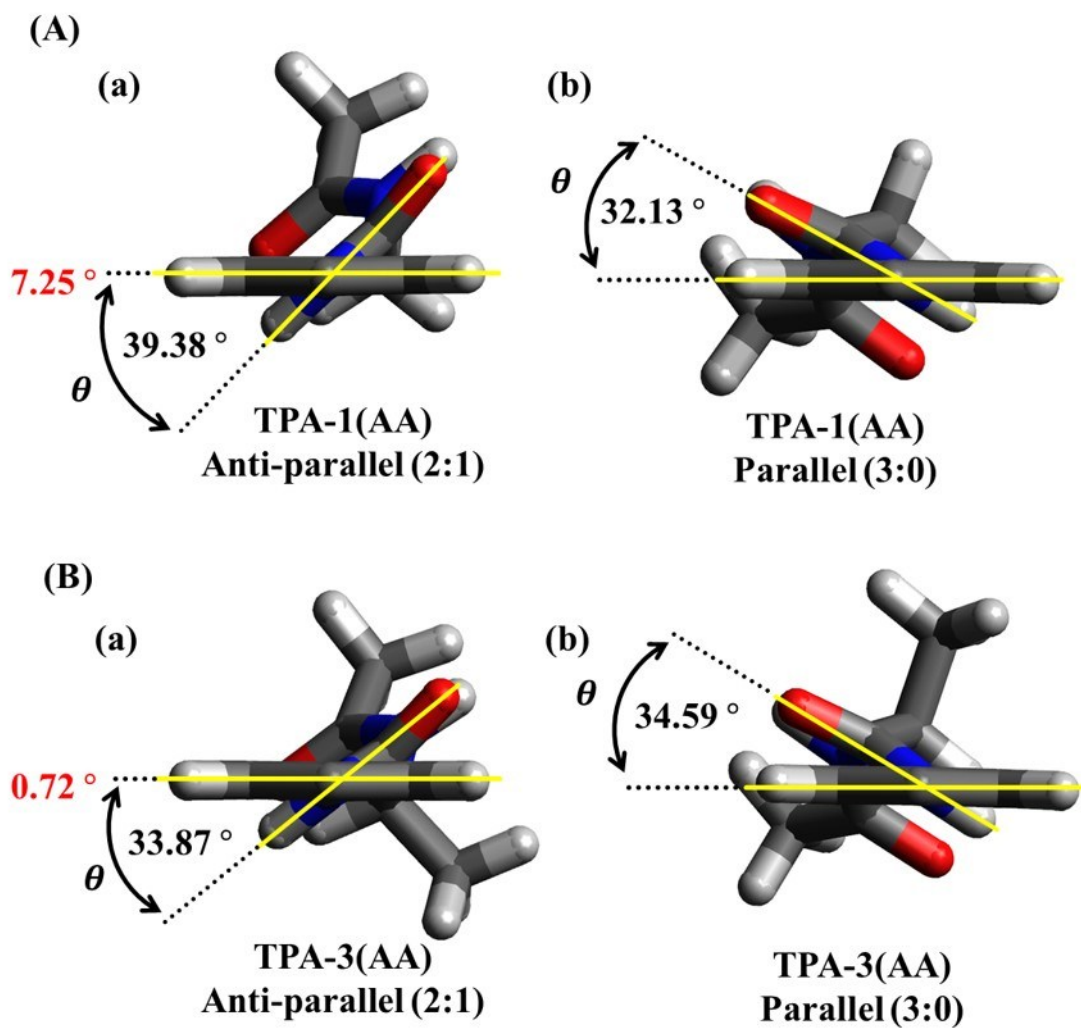

**Fig. S12** Three-dimensional structures and the carbonyl-phenyl dihedral angles ( $\theta$ ) of monomer of (A) TPA-1(AA) and (B) TPA-3(AA) for (a) anti-parallel (2:1) and (b) parallel (3:0) conformations.

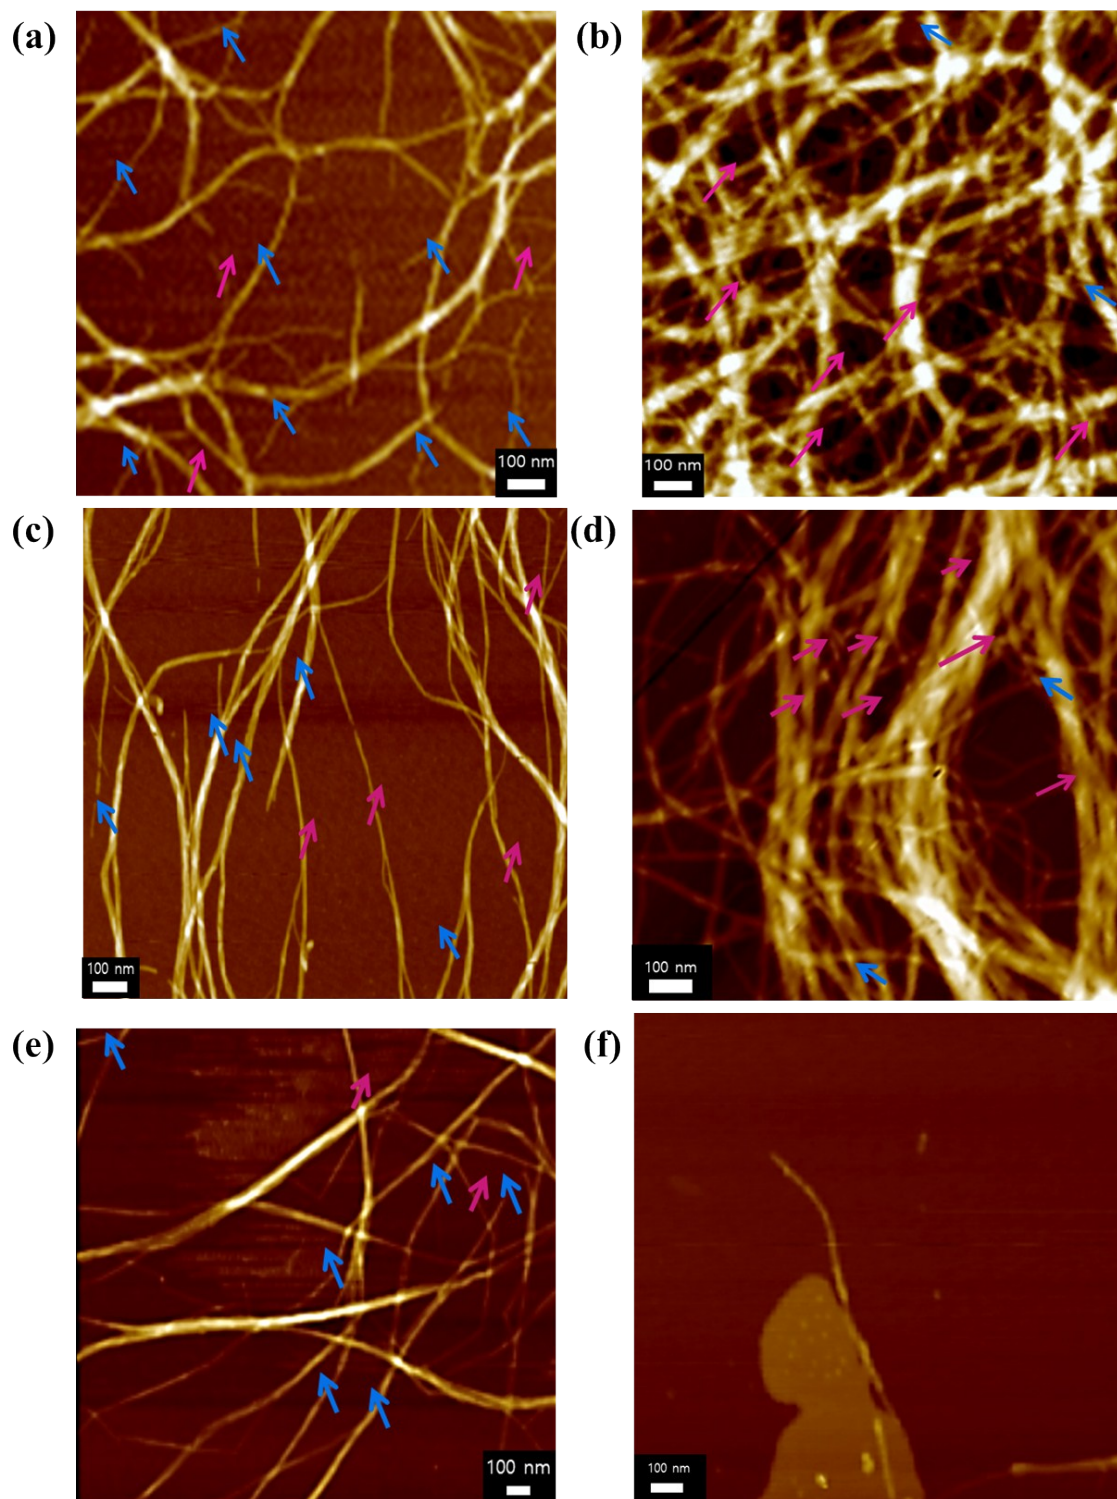

**Fig. S13** AFM images of supramolecular polymers (a and b) TPA-1, (c and d) TPA-2 and (e and f) TPA-3 formed at 298 K (a, c and e) and 333 K (b, d, and f).

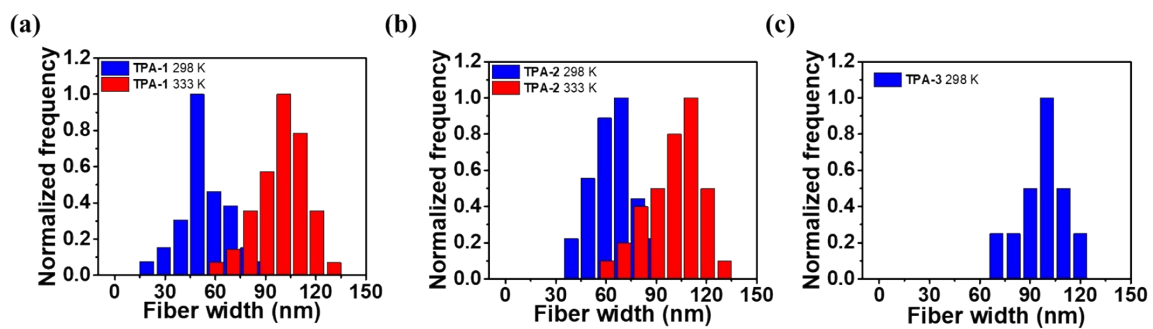

**Fig. S14** Fiber width distribution of supramolecular polymers (a) **TPA-1** (b) **TPA-2** and (c) **TPA-3**.

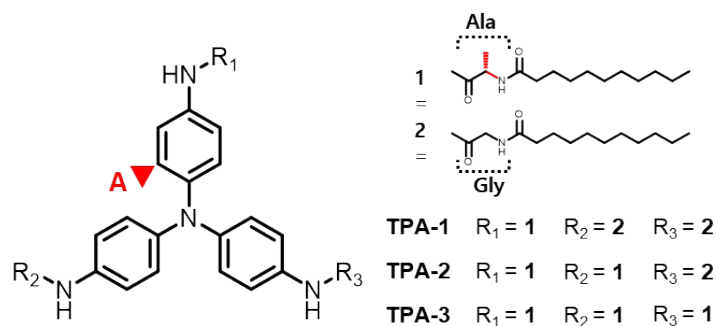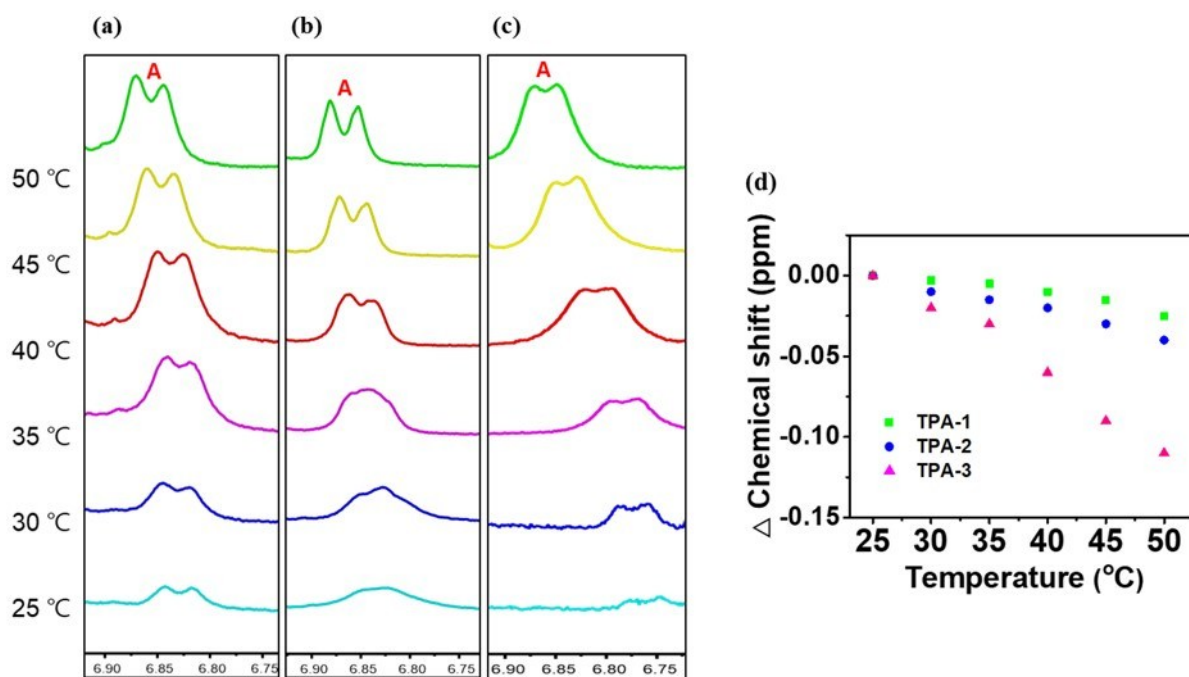

**Fig. S15** Temperature-dependent  $^1\text{H}$  NMR spectra of (a) **TPA-1**, (b) **TPA-2** and (c) **TPA-3** in toluene- $d_8$ / $\text{CDCl}_3$  (3:7 v/v) (the concentration of samples was  $1 \times 10^{-3}$  M). (d) Plot for chemical shifts of the proton (A) of **TPA-1** (green), **TPA-2** (blue) and **TPA-3** (pink) as a function of temperatures.

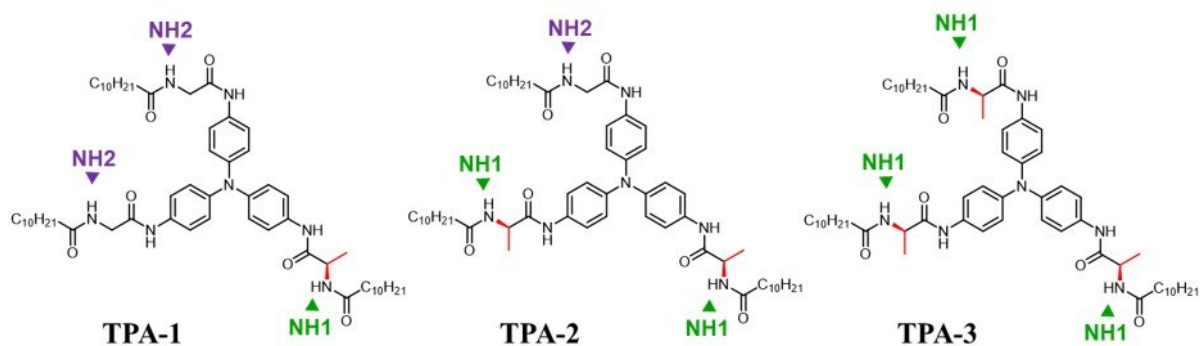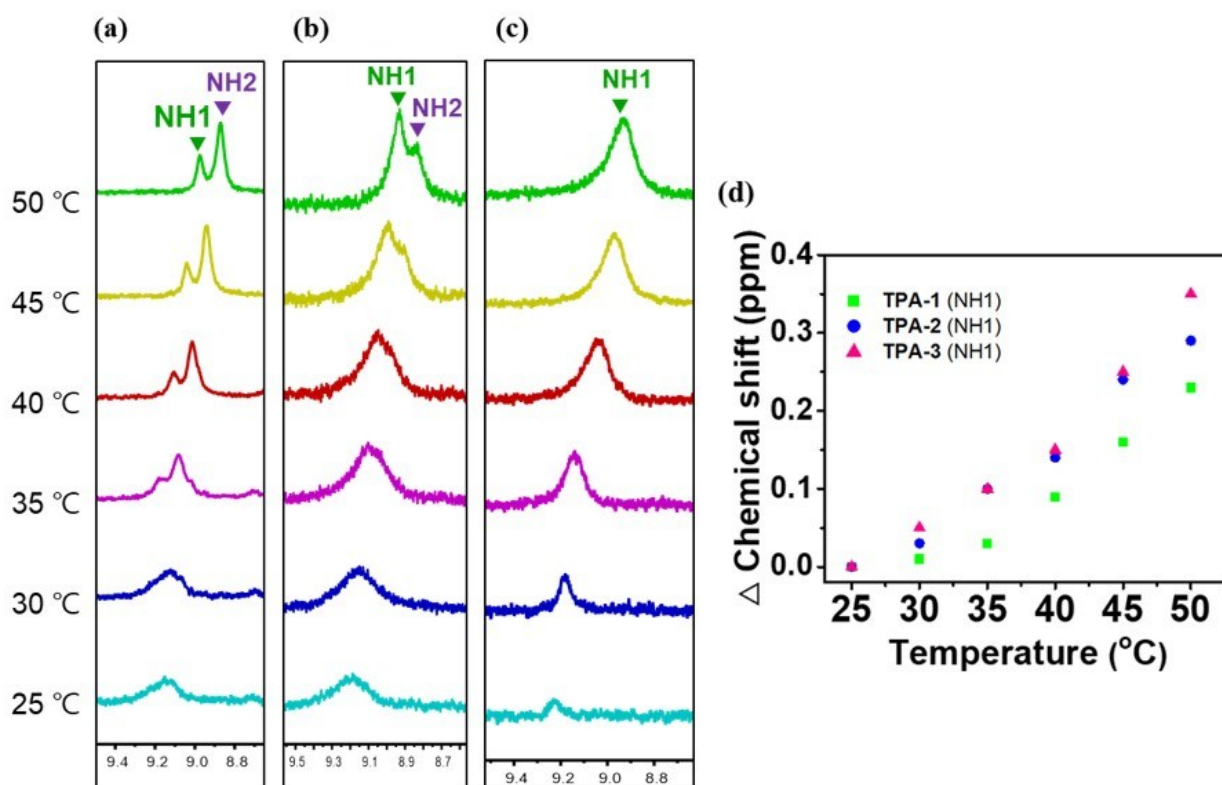

**Fig. S16** Temperature-dependent <sup>1</sup>H NMR spectra of (a) TPA-1, (b) TPA-2 and (c) TPA-3 in toluene-d<sub>8</sub>/CDCl<sub>3</sub> (3:7 v/v) (the concentration of samples was 1 x 10<sup>-3</sup> M). (d) Plot for chemical shifts of the proton (NH1) of TPA-1 (green), TPA-2 (blue) and TPA-3 (pink) as a function of temperatures.

## Table

**Table S1.** Comparison of the relative energies between parallel (3:0) and anti-parallel (2:1) conformations of **TPA-1** and **TPA-3**

|                                 | <b>TPA-1</b>          |                            | <b>TPA-3</b>          |                            |
|---------------------------------|-----------------------|----------------------------|-----------------------|----------------------------|
|                                 | <b>Parallel (3:0)</b> | <b>Anti-parallel (2:1)</b> | <b>Parallel (3:0)</b> | <b>Anti-parallel (2:1)</b> |
| <b>Relative energy (kJ/mol)</b> | 14.76                 | 0                          | 14.61                 | 0                          |

**Table S2.** Calculated carbonyl-phenyl dihedral angle ( $\theta$ ) of **TPA-1** and **TPA-3** for parallel (3:0) and anti-parallel (2:1) conformations

|                                             |                      | TPA-1          |                     |            | TPA-3          |                     |            |
|---------------------------------------------|----------------------|----------------|---------------------|------------|----------------|---------------------|------------|
|                                             |                      | Parallel (3:0) | Anti-parallel (2:1) | Difference | Parallel (3:0) | Anti-parallel (2:1) | Difference |
| carbonyl-phenyl dihedral angle ( $\theta$ ) | <b>R<sub>1</sub></b> | 35.08          | 32.09               | 2.99       | 35.72          | 32.96               | 2.76       |
|                                             | <b>R<sub>2</sub></b> | 31.55          | 35.92               | 4.37       | 35.16          | 39.74               | 4.58       |
|                                             | <b>R<sub>3</sub></b> | 32.13          | 39.38               | 7.25       | 34.59          | 33.87               | 0.72       |

**Table S3.** Calculated hydrogen bond length ( $d_H$ ), angle ( $\alpha$ ), and interdiscotic distance ( $d_D$ ) of

|                                                |                | TPA-1             |                        |            | TPA-3             |                        |            |      |
|------------------------------------------------|----------------|-------------------|------------------------|------------|-------------------|------------------------|------------|------|
|                                                |                | Parallel<br>(3:0) | Anti-parallel<br>(2:1) | Difference | Parallel<br>(3:0) | Anti-parallel<br>(2:1) | Difference |      |
| Hydrogen<br>bond length<br>( $d_H$ )           | R <sub>1</sub> | $d_{H1}$          | 1.76                   | 1.78       | 0.02              | 1.76                   | 1.78       | 0.02 |
|                                                |                | $d_{H2}$          | 1.87                   | 1.89       | 0.02              | 1.88                   | 1.89       | 0.01 |
|                                                | R <sub>2</sub> | $d_{H1}$          | 1.77                   | 1.78       | 0.01              | 1.76                   | 1.76       | 0    |
|                                                |                | $d_{H2}$          | 1.89                   | 1.88       | 0.01              | 1.88                   | 1.87       | 0.01 |
|                                                | R <sub>3</sub> | $d_{H1}$          | 1.78                   | 1.79       | 0.01              | 1.76                   | 1.80       | 0.02 |
|                                                |                | $d_{H2}$          | 1.88                   | 1.90       | 0.02              | 1.88                   | 1.90       | 0.02 |
| Smaller<br>interdiscotic<br>angle ( $\alpha$ ) | R <sub>1</sub> | 9.23              | 9.03                   | 0.2        | 9.11              | 8.85                   | 0.26       |      |
|                                                | R <sub>2</sub> | 10.48             | 9.38                   | 1.1        | 9.01              | 8.71                   | 0.3        |      |
|                                                | R <sub>3</sub> | 9.61              | 7.93                   | 1.68       | 9.10              | 8.33                   | 0.77       |      |
| Interdiscotic<br>distance ( $d_D$ )            | R <sub>1</sub> | 4.85              | 4.85                   | 0          | 4.85              | 4.84                   | 0.01       |      |
|                                                | R <sub>2</sub> | 4.81              | 4.82                   | 0.01       | 4.84              | 4.86                   | 0.02       |      |
|                                                | R <sub>3</sub> | 4.81              | 4.82                   | 0.01       | 4.85              | 4.83                   | 0.02       |      |

TPA-1 and TPA-3 for parallel (3:0) and anti-parallel (2:1) conformations



**Table S4.** Distribution ratios of right- and left-handed helical fibers of supramolecular polymers **TPA-1**, **TPA-2** and **TPA-3** obtained at different temperatures

|              | Temperature [K] | Left | Right | Diameters [nm] |
|--------------|-----------------|------|-------|----------------|
| <b>TPA-1</b> | 298 K           | 73%  | 27%   | 45             |
|              | 333 K           | 25%  | 75%   | 90             |
| <b>TPA-2</b> | 298 K           | 55%  | 45%   | 65             |
|              | 333 K           | 22%  | 78%   | 100            |
| <b>TPA-3</b> | 298 K           | 75%  | 25%   | 100            |
|              | 333 K           | -    | -     | 100            |

## Synthesis of Chain

### Synthetic methods for 4

Glycine methyl ester hydrochloride (3.2 g, 25.5 mmol) was dissolved in DCM (80 mL) before adding TEA (5.4 mL, 38.5 mmol). After stirring for 15 min, the solution was cooled to 0°C, and undecanoyl chloride (4 g, 19.5 mmol) was added slowly over one hour. The solution was allowed to warm to RT and was stirred overnight. HCl (10%, 10 mL) was added and the mixture was extracted with DCM (3 × 10 mL). The combined organic extracts were washed with HCl (10%, 10 mL) and brine (10 mL). The solution was dried over Na<sub>2</sub>SO<sub>4</sub>, filtered, and the solvent was evaporated to dryness under reduced pressure. The crude product was dried under vacuum to give **6** as a white solid in 91% yield. mp 63 – 64 °C; <sup>1</sup>H NMR (300 MHz, DMSO-*d*<sub>6</sub>) δ ppm 0.86 (t, *J* = 6.7 Hz, 3H), 3.62 (s, 3H), 8.23 (dd, *J* = 8.6, 3.4 Hz, 1H), 1.24 (m, 14H), 1.48 (m, 2H), 3.81 (d, *J* = 5.9 Hz, 2H), 2.11 (t, *J* = 7.3 Hz, 2H); <sup>13</sup>C NMR (75 MHz DMSO-*d*<sub>6</sub>) δ ppm 173.14, 170.92, 51.95, 35.45, 31.82, 29.50, 25.64, 22.59, 14.33 ESI-MS (*m/z*): Calculated for C<sub>14</sub>H<sub>27</sub>NO<sub>3</sub> [M+H]<sup>+</sup> 258.19, Found [M+H]<sup>+</sup> 258.08.

### Synthetic methods for 2

A solution of **4** (4.5 g, 17.5 mmol) in a mixture with MeOH (100 mL) was heated to reflux. The reaction mixture was then added to aqueous 1 M NaOH.<sup>S11, S12</sup> After refluxing for 7 h, the organic solvents were removed in vacuo, and water (10 mL) was added. The remaining aqueous solution was acidified to pH 3 by adding 3 N HCl. The resulting precipitate was filtered and washed with water. The precipitate was dried under vacuum to give **4** as a white solid in 82% yield. mp 118 – 119 °C; <sup>1</sup>H NMR (300 MHz, DMSO-*d*<sub>6</sub>) δ ppm 1.24 (m, 14H), 1.48 (m, 2H), 2.10 (t, *J* = 7.4 Hz, 2H), 3.72 (d, *J* = 5.9 Hz, 2H), 8.09 (t, *J* = 5.8 Hz, 1H), 12.46 (d, *J* = 0.9 Hz, 1H), 0.86 (t, *J* = 6.7 Hz, 1H); <sup>13</sup>C NMR (75 MHz DMSO-*d*<sub>6</sub>) δ ppm 173.14, 170.92, 51.95, 35.45, 31.82, 29.50, 25.64, 22.59, 14.33 ; ESI-MS (*m/z*): Calculated for C<sub>13</sub>H<sub>25</sub>NO<sub>3</sub> [M+H]<sup>+</sup> 243.18, Found [M+H]<sup>+</sup> 244.17.

### Synthetic methods for **3**

D-alanine methyl ester hydrochloride (3.5 g, 25 mmol) was dissolved in DCM (80 mL) before adding TEA (4.8 mL, 39 mmol). After stirring for 15 min, the solution was cooled to 0°C and undecanoyl chloride (4 g, 19.5 mmol) was added slowly over one hour. The solution was allowed to warm to RT and stirred overnight. HCl (10%, 10 mL) was added and the mixture was extracted with DCM (3 × 10 mL). The combined organic extracts were washed with 10% HCl (10 mL) and brine (10 mL). The solution was dried over Na<sub>2</sub>SO<sub>4</sub>, filtered, and the solvent was evaporated to dryness under reduced pressure. The crude product was dried under vacuum to give **4** as a white solid in 83% yield. mp 63 – 64 °C; <sup>1</sup>H NMR (300 MHz, DMSO-*d*<sub>6</sub>) δ ppm 1.48 0 (m, 2H), 2.09 (t, *J* = 7.3 Hz, 2H), 3.61 (s, 3H), 4.24 (p, *J* = 7.3 Hz, 1H), 0.86 (t, *J* = 6.7 Hz, 3H), 8.20 (d, *J* = 6.9 Hz, 1H), 1.24 (dd, *J* = 9.4, 3.2 Hz, 17H); <sup>13</sup>C NMR (75 MHz, DMSO-*d*<sub>6</sub>) δ ppm 173.75, 172.60, 52.19, 47.87, 35.35, 31.78, 29.44, 29.26, 29.18, 29.02, 25.60, 22.57, 17.41, 14.42; ESI-MS (m/z): Calculated for C<sub>15</sub>H<sub>29</sub>NO<sub>3</sub> [M+H]<sup>+</sup> 271.81, Found [M+H]<sup>+</sup> 272.17.

### Synthetic methods for **1**

A solution of **3** (3 g, 11 mmol) in a mixture with MeOH (50 mL) was heated to reflux. The reaction mixture was then added to aqueous 1 M NaOH.<sup>S11, S12</sup> After refluxing for 7 h, the organic solvents were removed in vacuo, and water (10 mL) was added. The remaining aqueous solution was acidified to pH 3 by adding 3 N HCl. The resulting precipitate was filtered and washed with water. The precipitate was dried under vacuum to give **3** as a white solid in 85% yield. We confirmed the racemization of alanine-appended **1** by HPLC with chiral columns, which resulted in the presence of pure D-alanine-appended **1**. mp 118 – 119 °C; <sup>1</sup>H NMR (300 MHz, DMSO-*d*<sub>6</sub>) δ ppm 2.09 (t, *J* = 7.3 Hz, 2H), 4.19 (m, 1H), 8.06 (d, *J* = 6.5 Hz, 1H), 12.42 (dd, *J* = 2.2, 1.0 Hz, 1H), 1.25 (d, *J* = 3.3 Hz, 17H), 0.86 (d, *J* = 6.9 Hz, 3H), 1.48 (d, *J* = 5.2 Hz, 2H); <sup>13</sup>C NMR (75 MHz DMSO-*d*<sub>6</sub>) δ ppm 175.47, 172.46, 47.77, 35.45, 31.78, 29.45, 29.28, 29.18, 29.07, 25.65, 22.57, 17.66, 14.43; ESI-MS (m/z): Calculated for C<sub>14</sub>H<sub>27</sub>NO<sub>3</sub> [M+H]<sup>+</sup> 257.20, Found [M+H]<sup>+</sup> 257.92.

# Synthesis of TPAs

## Synthetic methods for C1

A mixture of **2** (1.67 g, 6.8 mmol), EDC (1.45 g, 7.6 mmol), and HOBt (1.02 g, 7.6 mmol) was dried in vacuo for 8 h then dissolved in DMF (50 mL). TEA (1.1 mL, 7.5 mmol) was added after the solution was cooled to 0 °C, then, it was stirred for 1 h. To the mixed solution, tris(4-aminophenyl)amine (1.0 g, 3.4 mmol) dissolved in DMF (10 mL) was added, and it was stirred for 36 h at room temperature. The solvent was removed by evaporation. The crude product was dissolved in DCM and washed with brine three times. The solution was dried over Na<sub>2</sub>SO<sub>4</sub>, filtered, and the solvent was evaporated to dryness under reduced pressure. The crude material was purified by column chromatography (CDCl<sub>3</sub>:MeOH = 95:5, R<sub>f</sub> = 0.25) and concentrated under reduced pressure. The crude product was obtained and recrystallized from THF/Hexane (1:9) to give a orange solid. The orange solid was dissolved in ACN by heating at 80 °C, and the solution was cooled to RT to afford a beige powder by recrystallization (0.7 g, 27.5%, yield). mp 190 °C; <sup>1</sup>H NMR (300 MHz, DMSO-*d*<sub>6</sub>) δ ppm 6.85 (dddd, *J* = 65.0, 9.3, 8.7, 2.5 Hz, 12H), 8.08 (t, *J* = 5.7 Hz, 2H), 9.80 (s, 2H), 5.02 (s, 2H), 2.14 (t, *J* = 7.3 Hz, 4H), 1.49 (m, 4H), 0.85 (t, *J* = 6.6 Hz, 6H), 1.25 (s, 28H), 3.83 (d, *J* = 5.7 Hz, 4H); <sup>13</sup>C NMR (75 MHz DMSO-*d*<sub>6</sub>) δ ppm 173.12, 167.87, 146.24, 144.18, 133.04, 127.76, 124.10, 122.23, 120.74, 115.39, 43.00, 35.61, 31.78, 29.44, 25.67, 22.57, 14.43; ESI-MS (m/z): Calculated for C<sub>44</sub>H<sub>64</sub>N<sub>6</sub>O<sub>4</sub> [M+H]<sup>+</sup> 740.75, Found [M+H]<sup>+</sup> 740.49.

## Synthetic methods for TPA-1

A mixture of **1** (0.2 g, 0.77 mmol), EDC (0.16 g, 0.83 mmol), and HOBt (0.11 g, 0.81 mmol) was dried in vacuo for 8 h, then dissolved in DMF (40 mL). TEA (0.13 mL, 1.0 mmol) was added after the solution was cooled to 0 °C, then, it was stirred for 1 h. To the mixed solution, **C2** (0.5 g, 0.67 mmol) dissolved in DMF (10 mL) was added, and it was stirred for 36 h at room temperature. The solvent was removed by evaporation. The crude product was dissolved in DCM and washed with brine three times. The solution was dried over Na<sub>2</sub>SO<sub>4</sub>, filtered, and the solvent was evaporated to dryness under reduced pressure. The crude material was purified by column chromatography (CDCl<sub>3</sub>:MeOH = 95:5, R<sub>f</sub> = 0.28) and concentrated under reduced pressure. The crude product was obtained and recrystallized from THF/Hexane (1:9) to give a orange solid. The orange solid was dissolved in ACN by heating at 80 °C, and the solution was cooled to RT to afford a beige powder by recrystallization (0.32 g, 48%, yield). mp 200 °C; <sup>1</sup>H NMR (300 MHz, DMSO-*d*<sub>6</sub>) δ ppm 9.88 (m, 3H), 1.49 (dd, *J* = 1.3, 0.69 Hz, 6H), 8.11 (m, 3H), 7.49 (d, *J* = 1.6 Hz, 6H), 6.92 (m, 6H), 2.14 (m, 6H), 3.84 (s, 4H), 0.85 (d, *J* = 4.2 Hz, 9H), 1.25 (s, 45H), 4.38 (m, 1H); <sup>13</sup>C NMR (75 MHz DMSO-*d*<sub>6</sub>) δ ppm 14.42, 18.58, 22.57, 25.68, 29.12, 29.20, 29.30, 29.44, 31.78, 35.47, 35.51, 43.06, 49.33, 120.84, 124.04, 124.10, 124.20, 134.50, 143.27, 168.04, 171.62, 172.60, 173.15; ESI-MS (m/z): Calculated for C<sub>58</sub>H<sub>89</sub>N<sub>7</sub>O<sub>6</sub> [M-H]<sup>-</sup> 978.75, Found [M-H]<sup>-</sup> 978.69.

## Synthetic methods for **C2**

A mixture of **1** (2.04 g, 7.92 mmol), EDC (1.6 g, 8.3 mmol), and HOBt (0.9 g, 6.6 mmol) was dried in vacuo for 8 h, then dissolved in DMF (50 mL). TEA (1.1 mL, 7.5 mmol) was added after the solution was cooled to 0 °C, then, it was stirred for 1 h. To the mixed solution, tris(4-aminophenyl)amine (1.0 g, 3.4 mmol) dissolved in DMF (10 mL) was added, and it was stirred for 36 h at room temperature. The solvent was removed by evaporation. The crude product was dissolved in DCM and washed with brine three times. The solution was dried over Na<sub>2</sub>SO<sub>4</sub>, filtered, and the solvent was evaporated to dryness under reduced pressure. The crude material was purified by column chromatography (CDCl<sub>3</sub>:MeOH = 95:5, R<sub>f</sub> = 0.26) and concentrated under reduced pressure. The crude product was obtained and recrystallized from THF/Hexane (1:9) to give an orange solid. The orange solid was dissolved in ACN by heating at 80 °C, and the solution was cooled to RT to afford a beige powder by recrystallization (0.8 g, 30%, yield). mp 187 °C; <sup>1</sup>H NMR (300 MHz, DMSO-*d*<sub>6</sub>) δ ppm 7.40 (m, 12H), 8.02 (d, *J* = 7.3 Hz, 2H), 9.83 (s, 2H), 5.02 (s, 2H), 1.48 (m, 4H), 2.12 (t, *J* = 7.4 Hz, 4H), 0.85 (dd, *J* = 8.5, 4.8 Hz, 6H), 1.24 (d, *J* = 9.4 Hz, 34H), 4.38 (t, *J* = 7.1 Hz, 2H); <sup>13</sup>C NMR (75 MHz, DMSO-*d*<sub>6</sub>) δ ppm 14.42, 18.58, 22.57, 25.68, 29.10, 29.19, 29.29, 29.44, 31.78, 35.47, 49.32, 115.37, 120.86, 122.28, 124.10, 127.58, 133.17, 134.42, 143.29, 171.60, 172.58; ESI-MS (m/z): Calculated for C<sub>46</sub>H<sub>68</sub>N<sub>6</sub>O<sub>4</sub> [M+H]<sup>+</sup> 769.08, Found [M+H]<sup>+</sup> 768.53.

## Synthetic methods for **TPA-2**

A mixture of **2** (0.18 g, 0.74 mmol), EDC (0.15 g, 0.78 mmol), and HOBt (0.1 g, 0.74 mmol) was dried in vacuo for 8 h, then dissolved in DMF (50 mL). TEA (0.13 mL, 1.0 mmol) was added after the solution was cooled to 0 °C, then, it was stirred for 1 h. To the mixed solution, **C2** (0.5 g, 0.5 mmol) dissolved in DMF (10 mL) was added, and it was stirred for 36 h at room temperature. The solvent was removed by evaporation. The crude product was dissolved in DCM and washed with brine three times. The solution was dried over Na<sub>2</sub>SO<sub>4</sub>, filtered, and the solvent was evaporated to dryness under reduced pressure. The crude material was purified by column chromatography (CDCl<sub>3</sub>:MeOH = 95:5, R<sub>f</sub> = 0.28) and concentrated under reduced pressure. The crude product was obtained and recrystallized from THF/Hexane (1:9) to give a white solid. The orange solid was dissolved in ACN by heating at 80 °C, and the solution was cooled to RT to afford a beige powder by recrystallization (0.32 g, 48%, yield). mp 204 °C; <sup>1</sup>H NMR (300 MHz, DMSO-*d*<sub>6</sub>) δ ppm 6.90 (d, *J* = 8.8 Hz, 6H), 7.48 (m, 6H), 4.38 (t, *J* = 7.1 Hz, 2H), 3.83 (d, *J* = 5.7 Hz, 2H), 2.13 (q, *J* = 7.3, 7.2 Hz, 48H), 1.48 (m, 6H), 1.26 (d, *J* = 12.1 Hz, 48H), 0.84 (m, 9H), 9.89 (d, *J* = 10.5 Hz, 3H), 8.07 (dd, *J* = 10.6, 6.6 Hz, 3H) <sup>13</sup>C NMR (75 MHz DMSO-*d*<sub>6</sub>) δ ppm 14.43, 18.58, 22.57, 25.68, 29.09, 29.18, 29.27, 29.43, 31.77, 35.47, 35.61, 43.06, 49.32, 120.83, 120.86, 123.98, 124.13, 134.27, 134.45, 143.29, 168.03, 171.61, 172.59, 173.15 ESI-MS (m/z): Calculated for C<sub>59</sub>H<sub>91</sub>N<sub>7</sub>O<sub>6</sub> [M-H]<sup>+</sup> 992.75, Found [M-H]<sup>+</sup> 993.42.

### Synthetic methods for TPA-3

A mixture of **3** (2.75 g, 10.7 mmol), Tris(4-aminophenyl)amine (1.0 g, 3.4 mmol), EDC (3.3 g, 17.2 mmol), and HOBt (1.4 g, 10.5 mmol) was dried in vacuo for 8 h, then dissolved in DMF (50 mL) before adding TEA (4.8 mL, 34.4 mmol). The solution was stirred for 48 h at room temperature, and the solvent was removed by evaporation. The crude product was dissolved in chloroform and washed with brine three times. The solution was dried over Na<sub>2</sub>SO<sub>4</sub>, filtered, and the solvent was evaporated to dryness under reduced pressure. The crude material was purified by column chromatography (CDCl<sub>3</sub>:MeOH = 95:5, R<sub>f</sub> = 0.3) and concentrated under reduced pressure. The crude product was obtained and recrystallized from THF/Hexane (1:9) to give a white solid. (1.8 g, 52%, yield). ; mp 233 °C; <sup>1</sup>H NMR (300 MHz, DMSO-*d*<sub>6</sub>) δ ppm 2.12 (t, *J* = 7.3 Hz, 6H), 4.39 (t, *J* = 7.1 Hz, 3H), 6.90 (d, *J* = 8.9 Hz, 6H), 7.49 (d, *J* = 8.9 Hz, 6H), 8.04 (d, *J* = 7.2 Hz, 3H), 9.91 (s, 3H), 0.85 (t, *J* = 6.6 Hz, 3H), 1.23 (m, 51H), 1.49 (dd, *J* = 9.5, 3.4 Hz, 6H); <sup>13</sup>C NMR (75 MHz DMSO-*d*<sub>6</sub>) δ ppm 14.42, 18.58, 22.57, 25.68, 29.09, 29.18, 29.28, 29.43, 31.77, 25.47, 49.33, 120.87, 124.06, 134.42, 143.29, 171.61, 172.59. HR-MS (*m/z*): Calculated for C<sub>60</sub>H<sub>93</sub>N<sub>7</sub>O<sub>6</sub> [M+H]<sup>+</sup> 1007.7187, Found [M+H]<sup>+</sup> 1007.6835.

## Analytic Data

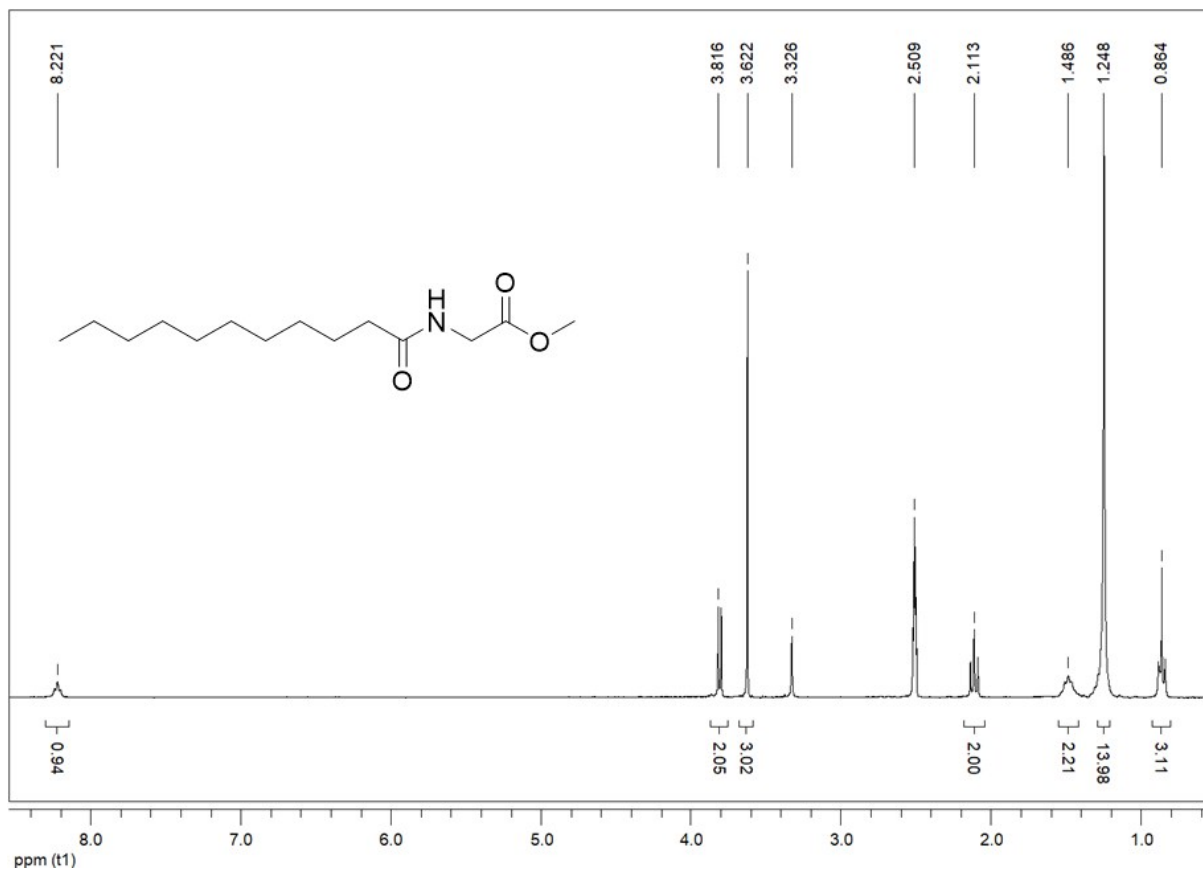

**Fig. S17** <sup>1</sup>H NMR spectrum (300 MHz) of **4** in DMSO-*d*<sub>6</sub> at 25 °C.

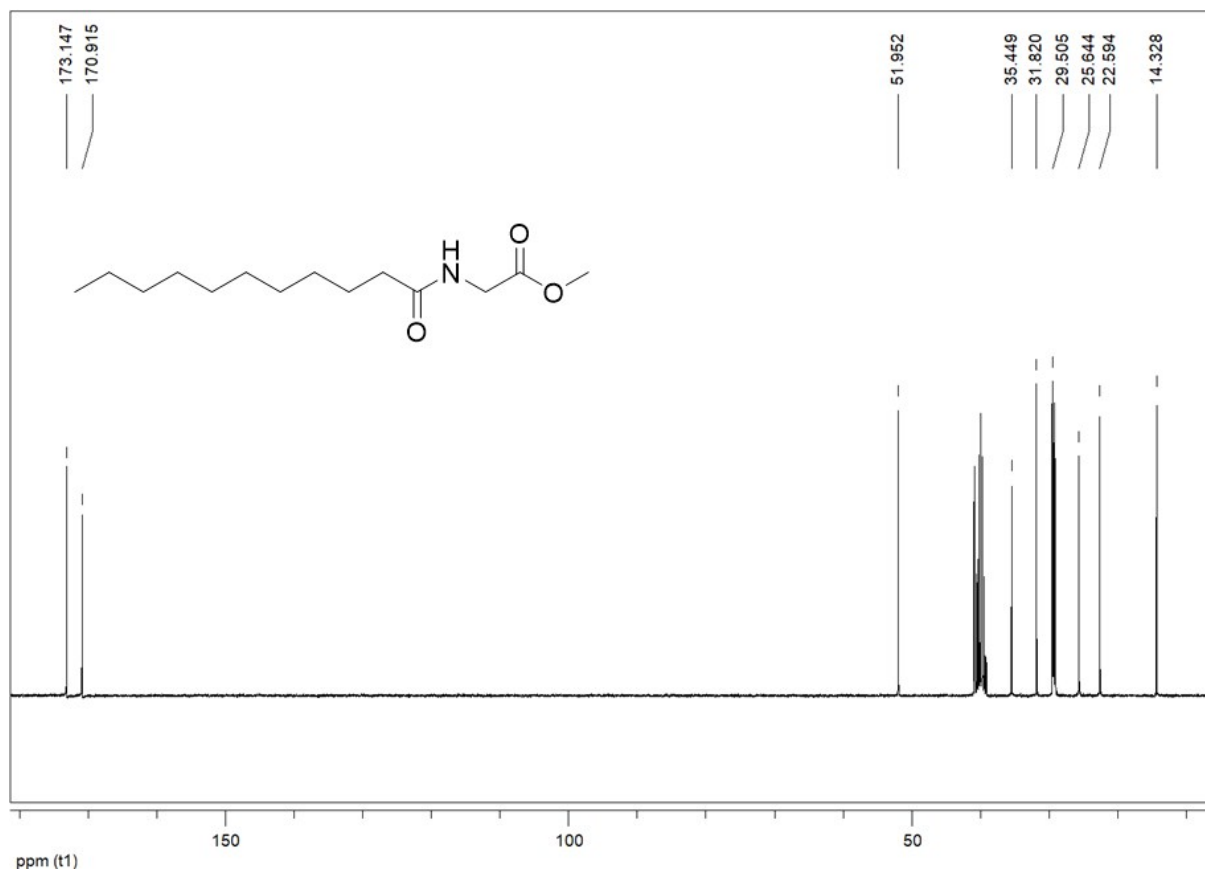

**Fig. S18** <sup>13</sup>C NMR spectrum (75 MHz) of **4** in DMSO-*d*<sub>6</sub> at 25 °C.



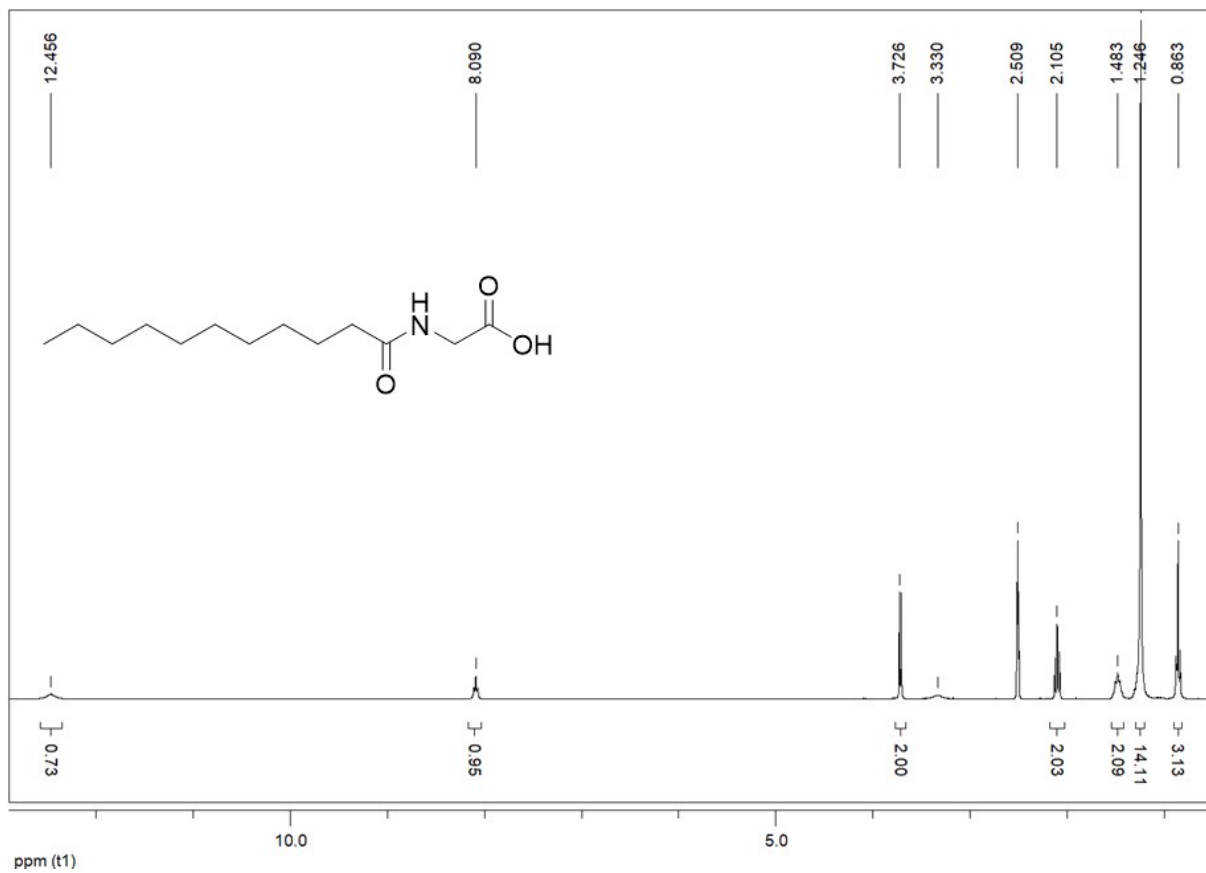

**Fig. S19**  $^1\text{H}$  NMR spectrum (300 MHz) of **2** in  $\text{DMSO-}d_6$  at 25 °C.

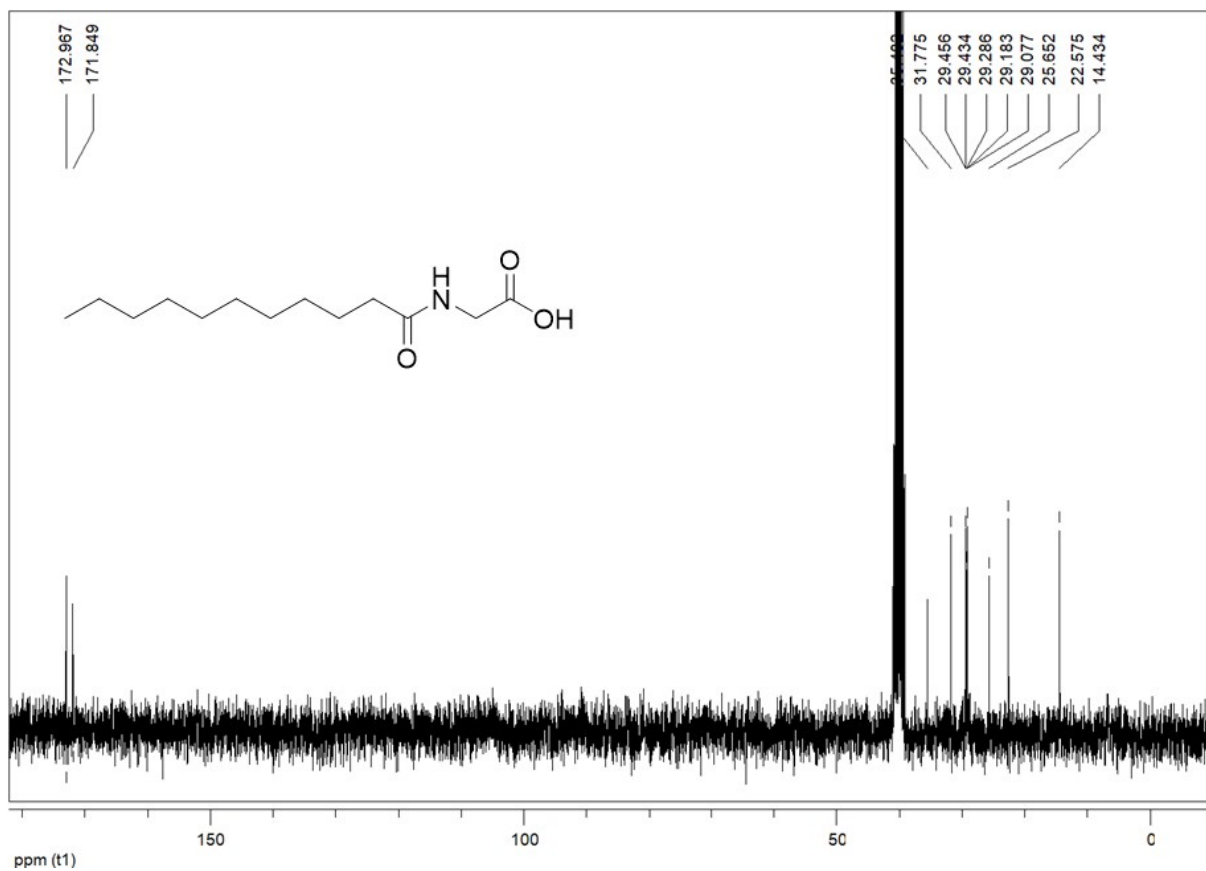

**Fig. S20** <sup>13</sup>C NMR spectrum (75 MHz) of **2** in DMSO-*d*<sub>6</sub> at 25 °C.

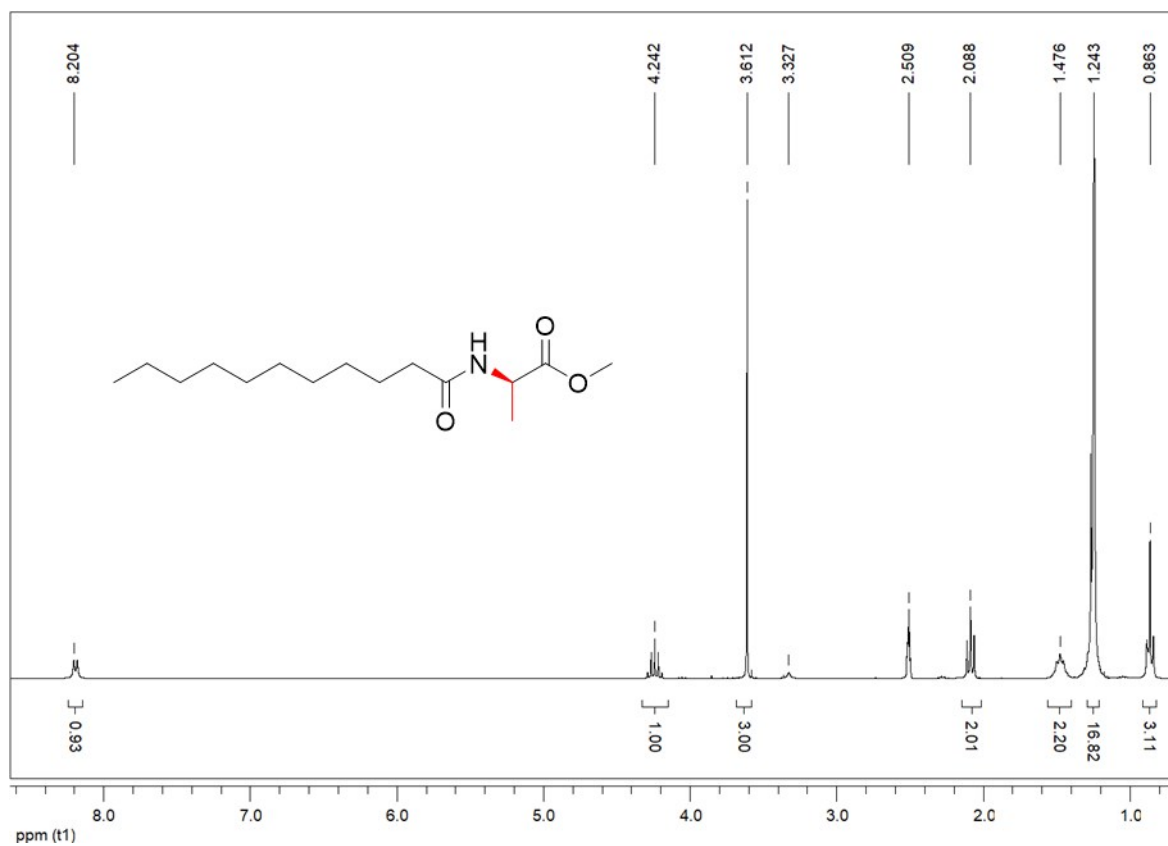

**Fig. S21** <sup>1</sup>H NMR spectrum (300 MHz) of **3** in DMSO-*d*<sub>6</sub> at 25 °C.

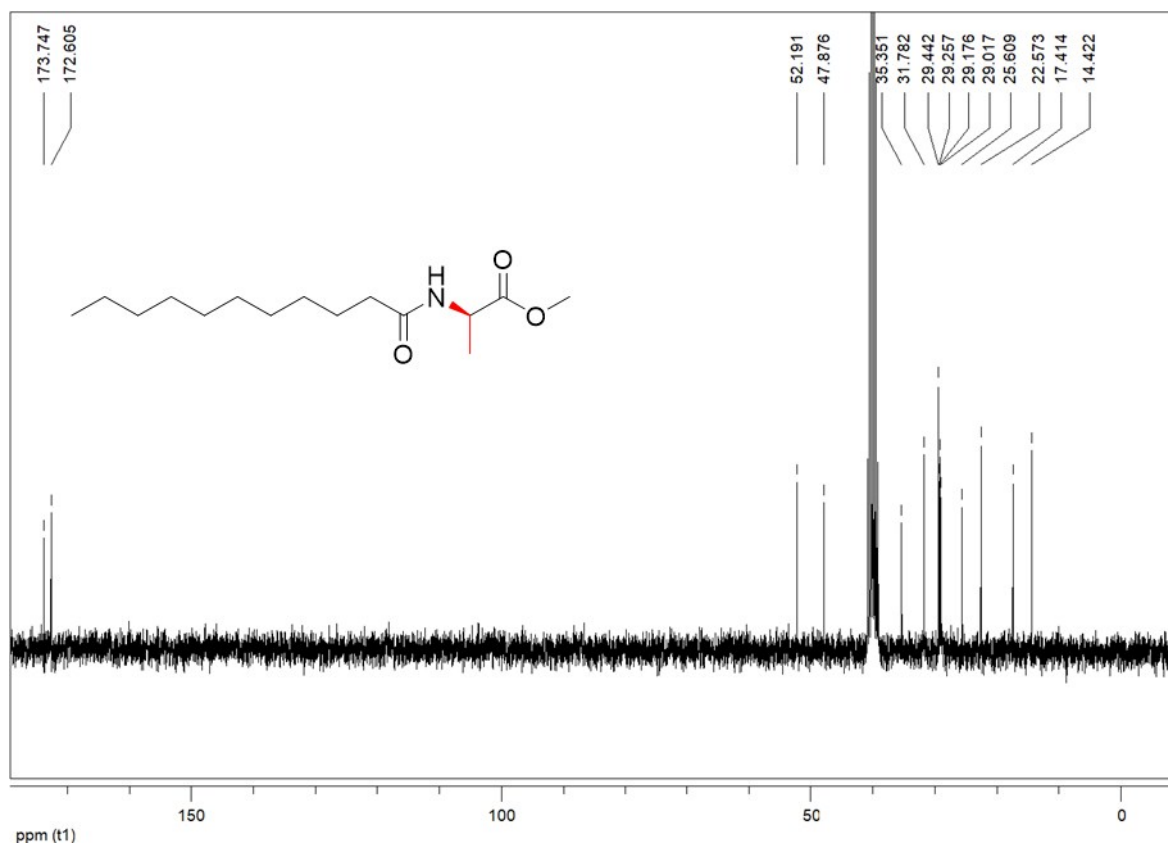

**Fig. S22**  $^{13}\text{C}$  NMR spectrum (75 MHz) of **3** in  $\text{DMSO-}d_6$  at  $25\text{ }^\circ\text{C}$ .

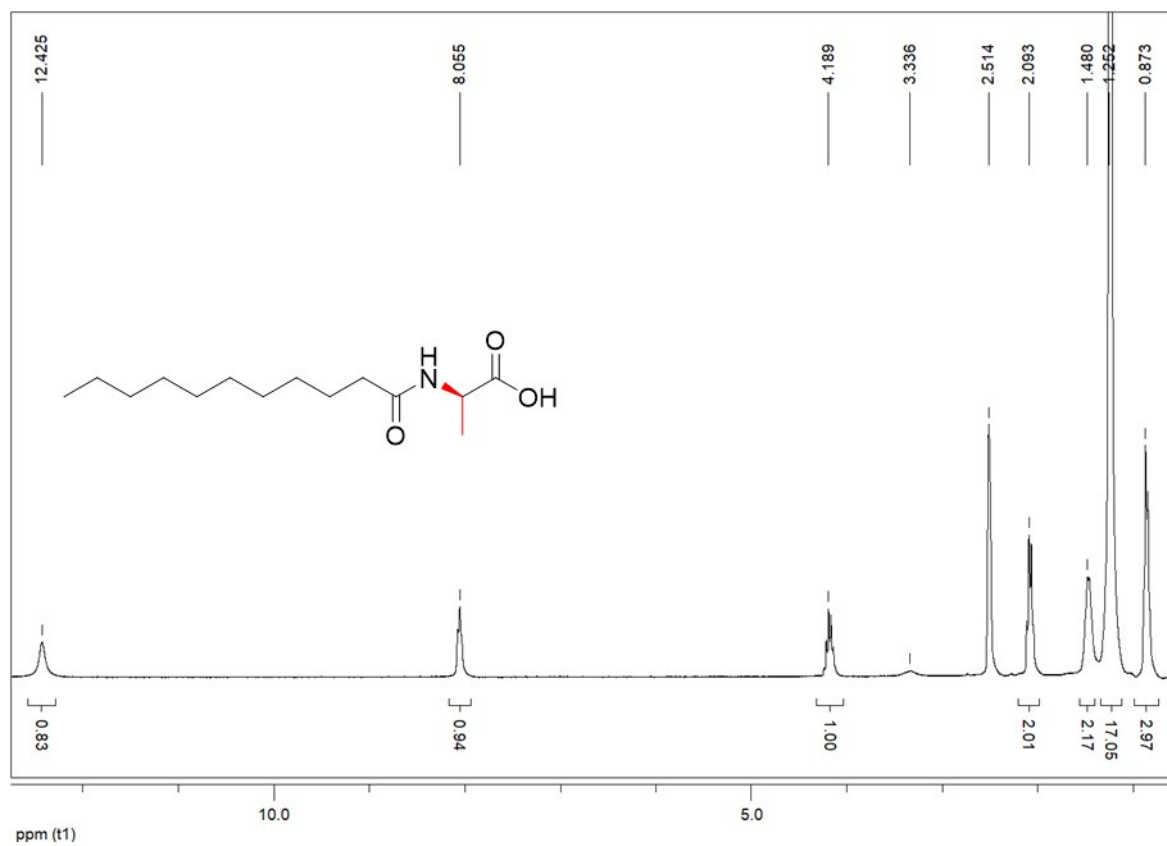

**Fig. S23** <sup>1</sup>H NMR spectrum (300 MHz) of **1** in DMSO-*d*<sub>6</sub> at 25 °C.

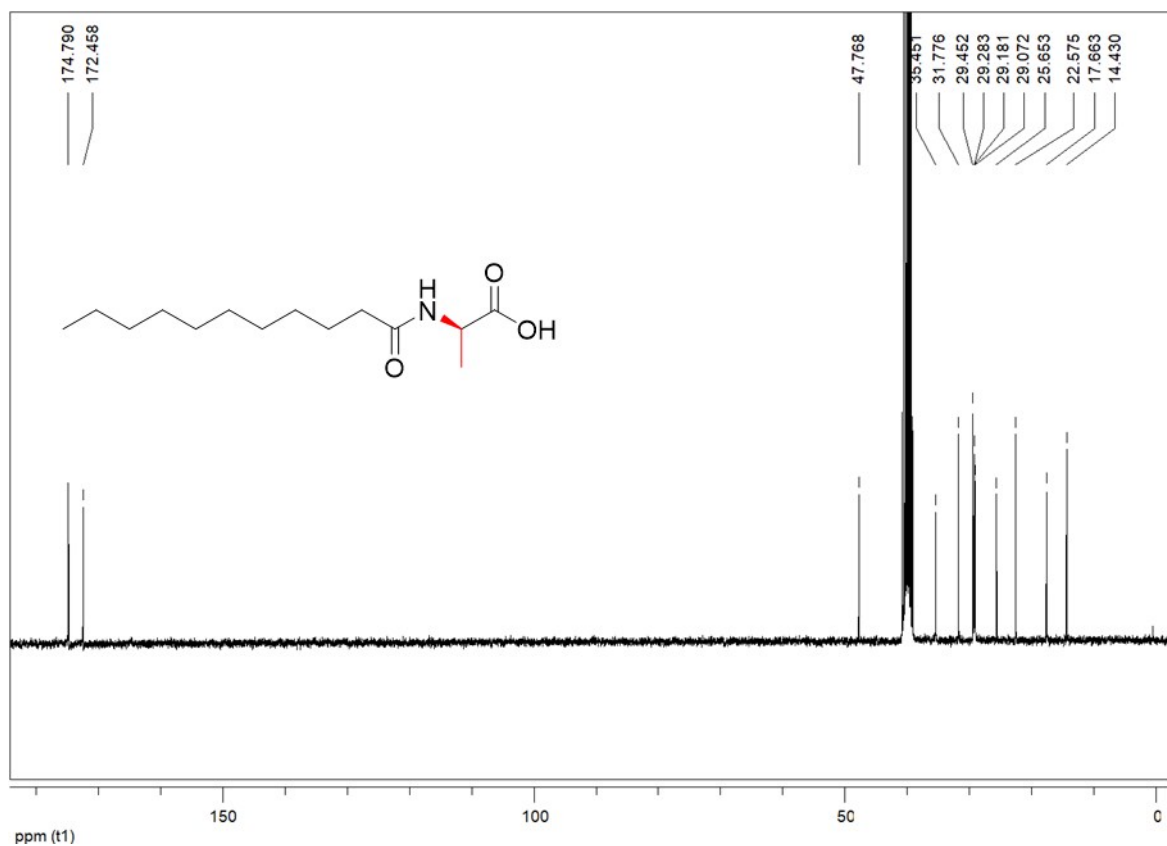

**Fig. S24** <sup>13</sup>C NMR spectrum (75 MHz) of **1** in DMSO-*d*<sub>6</sub> at 25 °C.

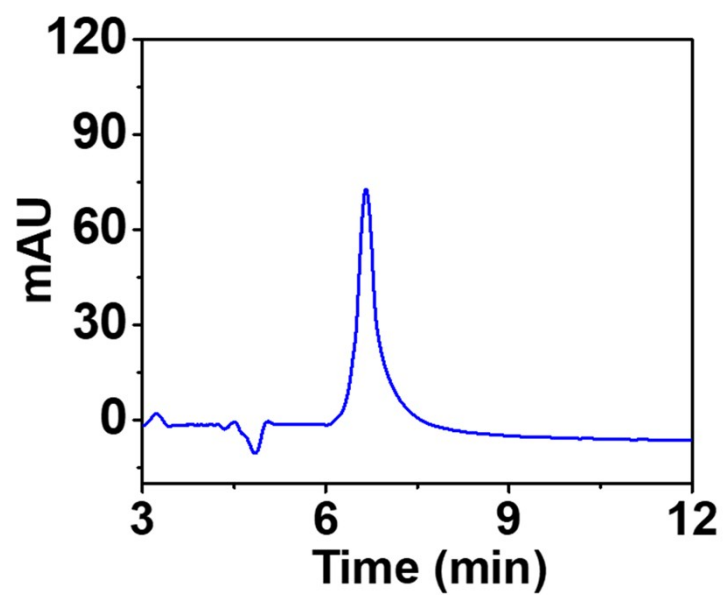

**Fig. S25** HPLC chromatogram of **1** on the chiralpack IA-3 column using hexane/ethanol/trifluoroacetic acid (80/20/0.1) as mobile phase at a flow rate of 0.5 mL/min.

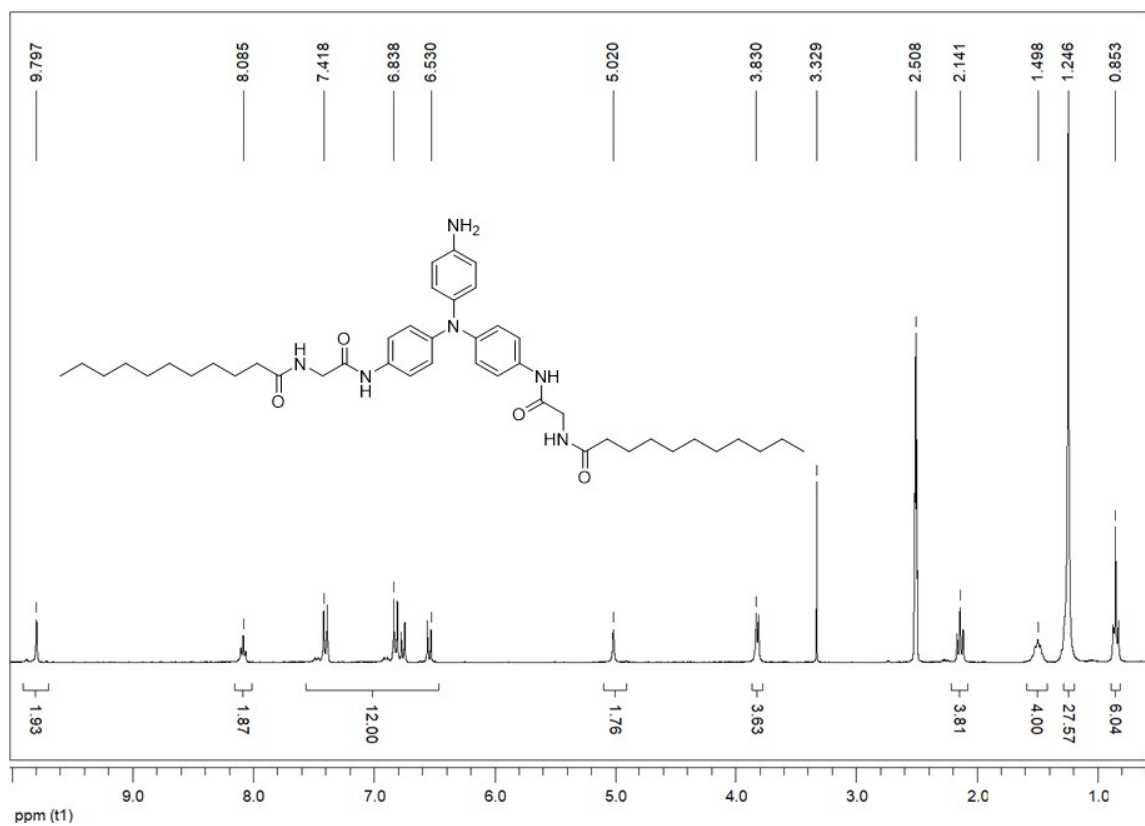

**Fig. S26** <sup>1</sup>H NMR spectrum (300 MHz) of C1 in DMSO-d<sub>6</sub> at 25 °C.



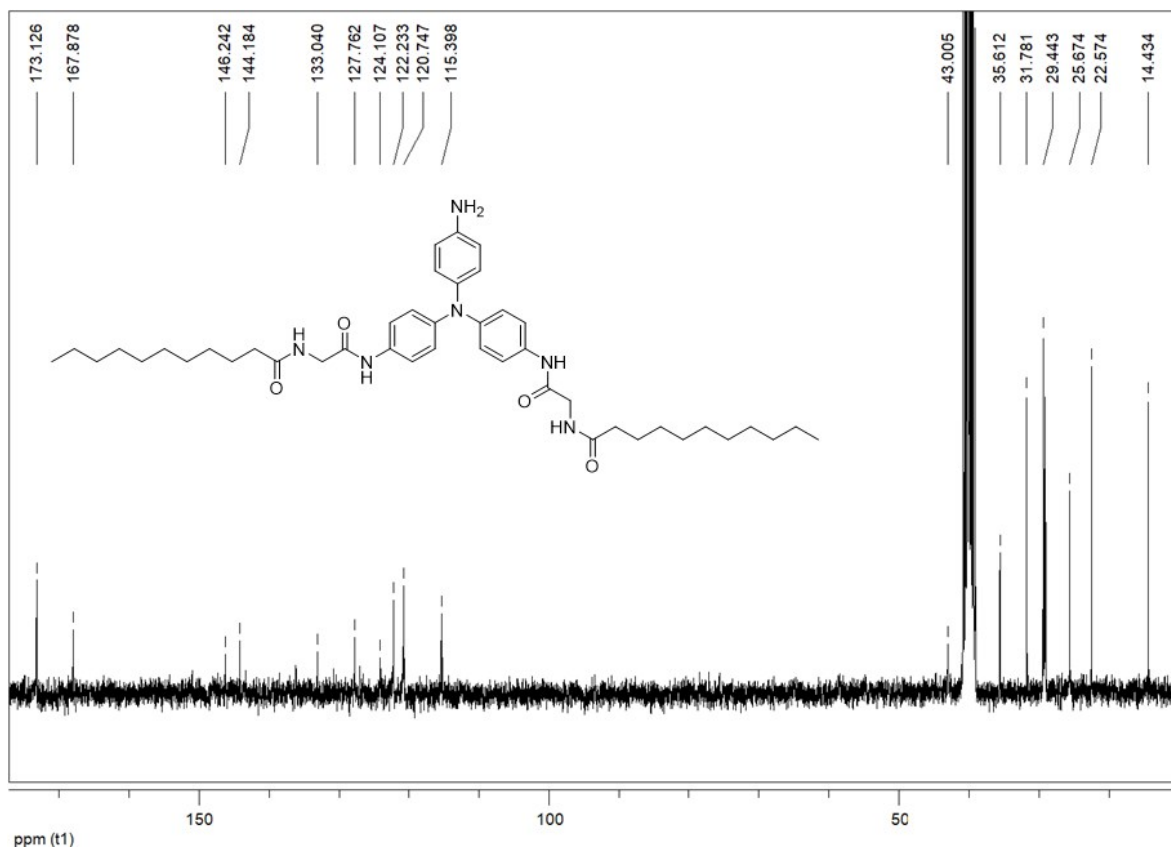

**Fig. S27** <sup>13</sup>C NMR spectrum (75 MHz) of **C1** in DMSO-*d*<sub>6</sub> at 25 °C.

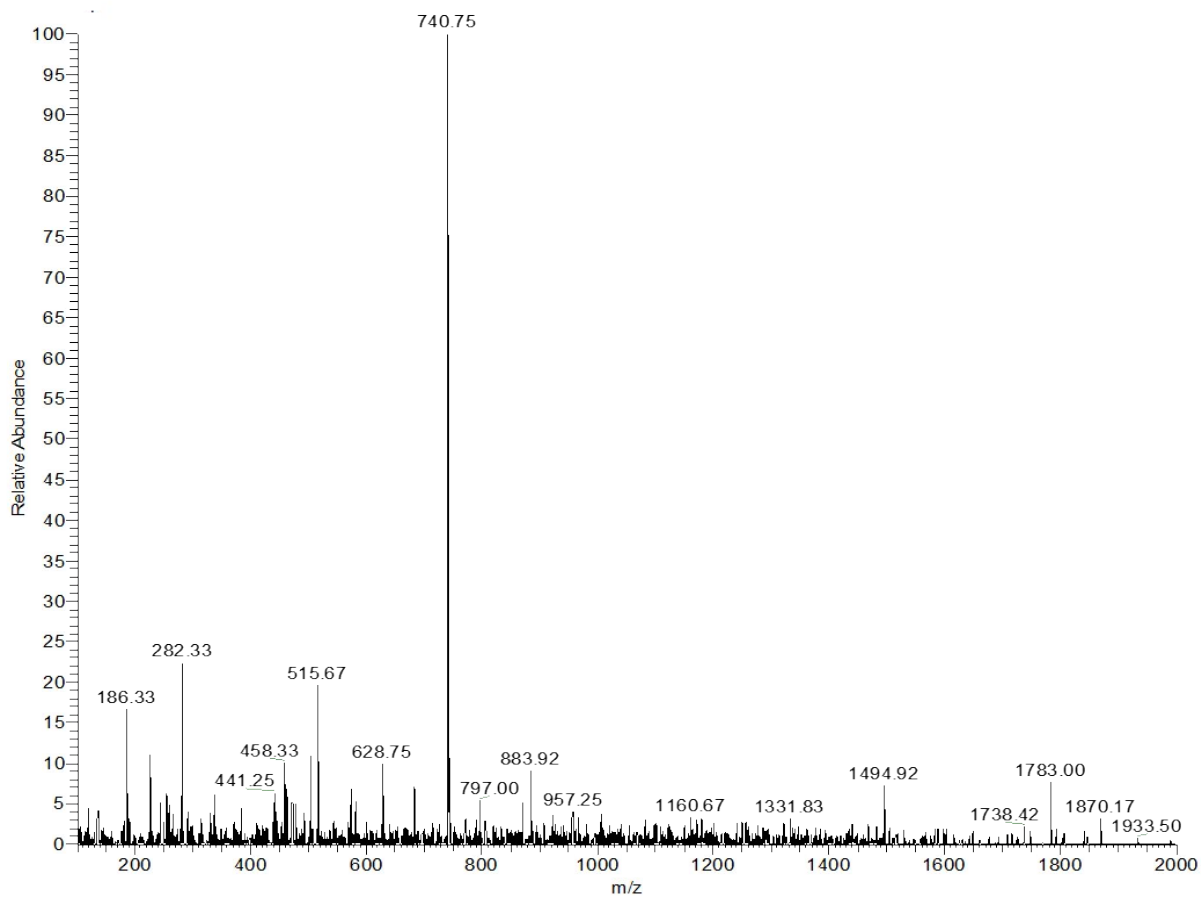

**Fig. S28** ESI-Mass spectrum of **C1**.

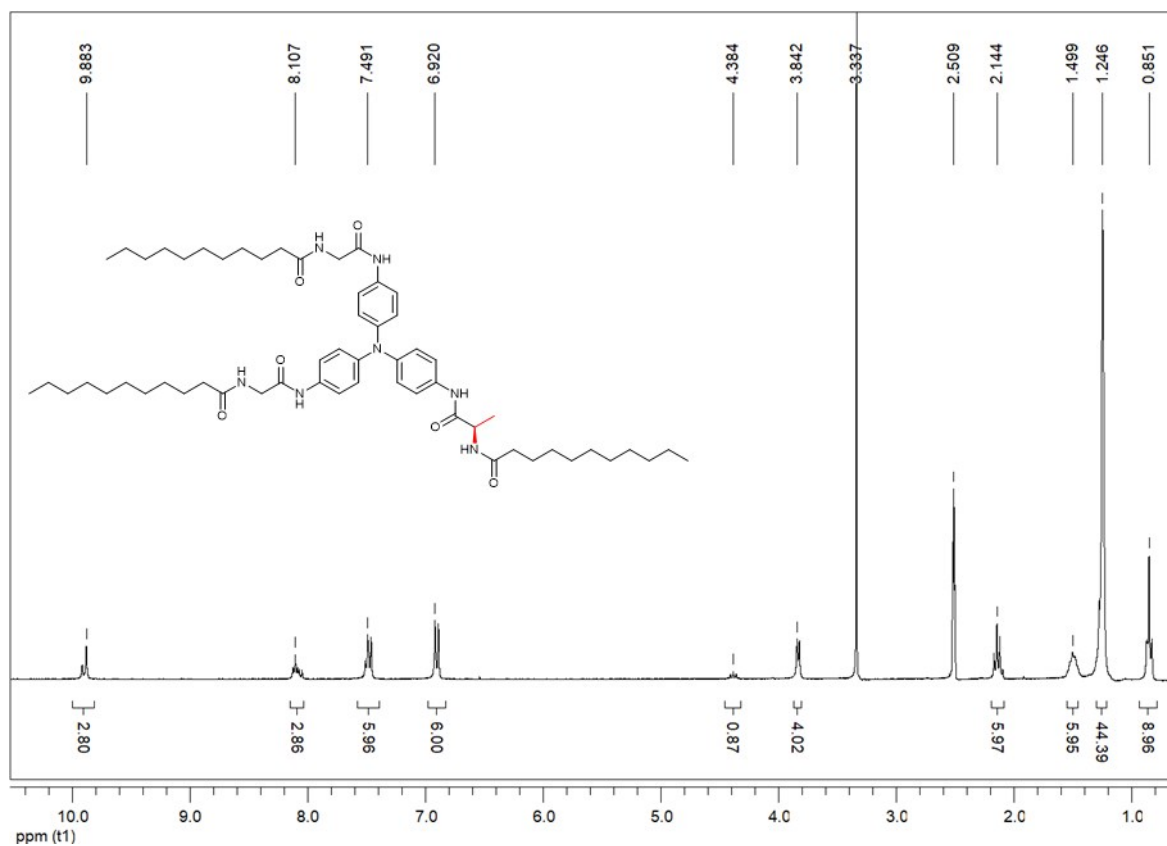

**Fig. S29** <sup>1</sup>H NMR spectrum (300 MHz) of TPA-1 in DMSO-*d*<sub>6</sub> at 25 °C.

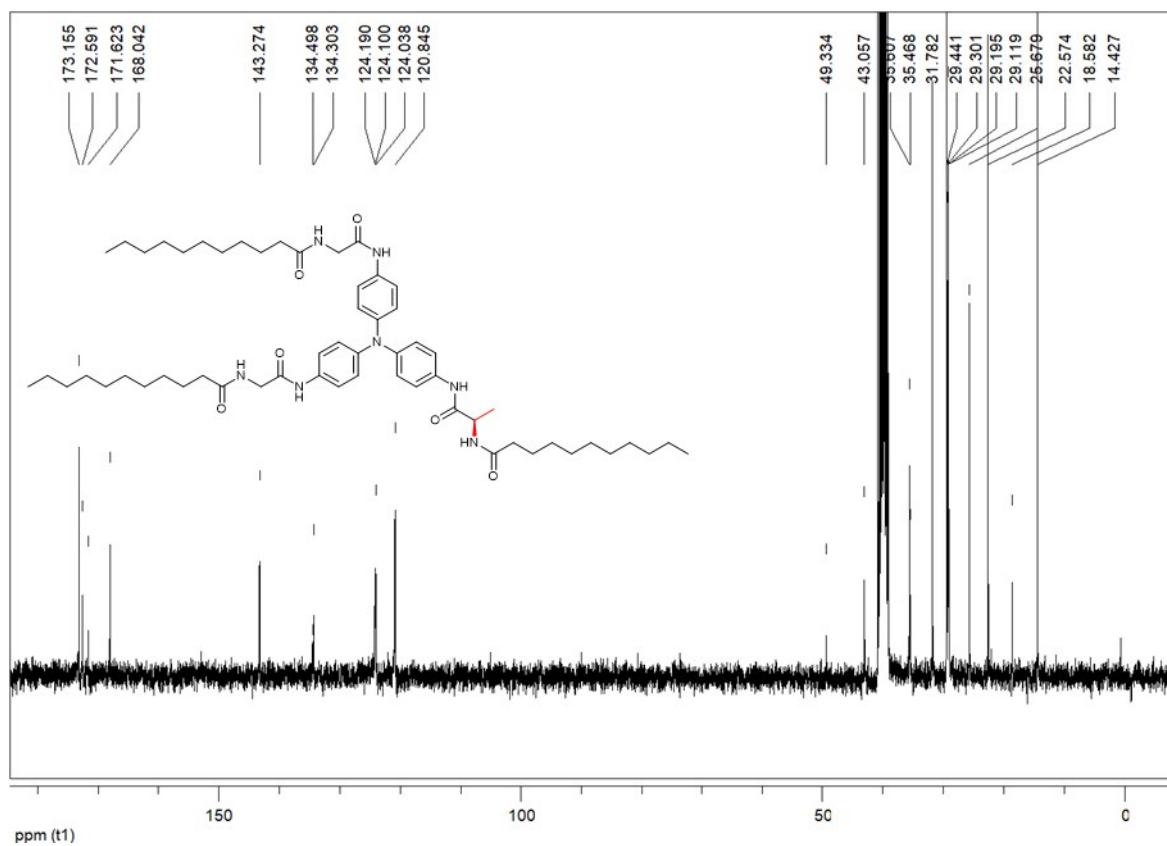

**Fig. S30** <sup>13</sup>C NMR spectrum (75 MHz) of TPA-1 in DMSO-*d*<sub>6</sub> at 25 °C.

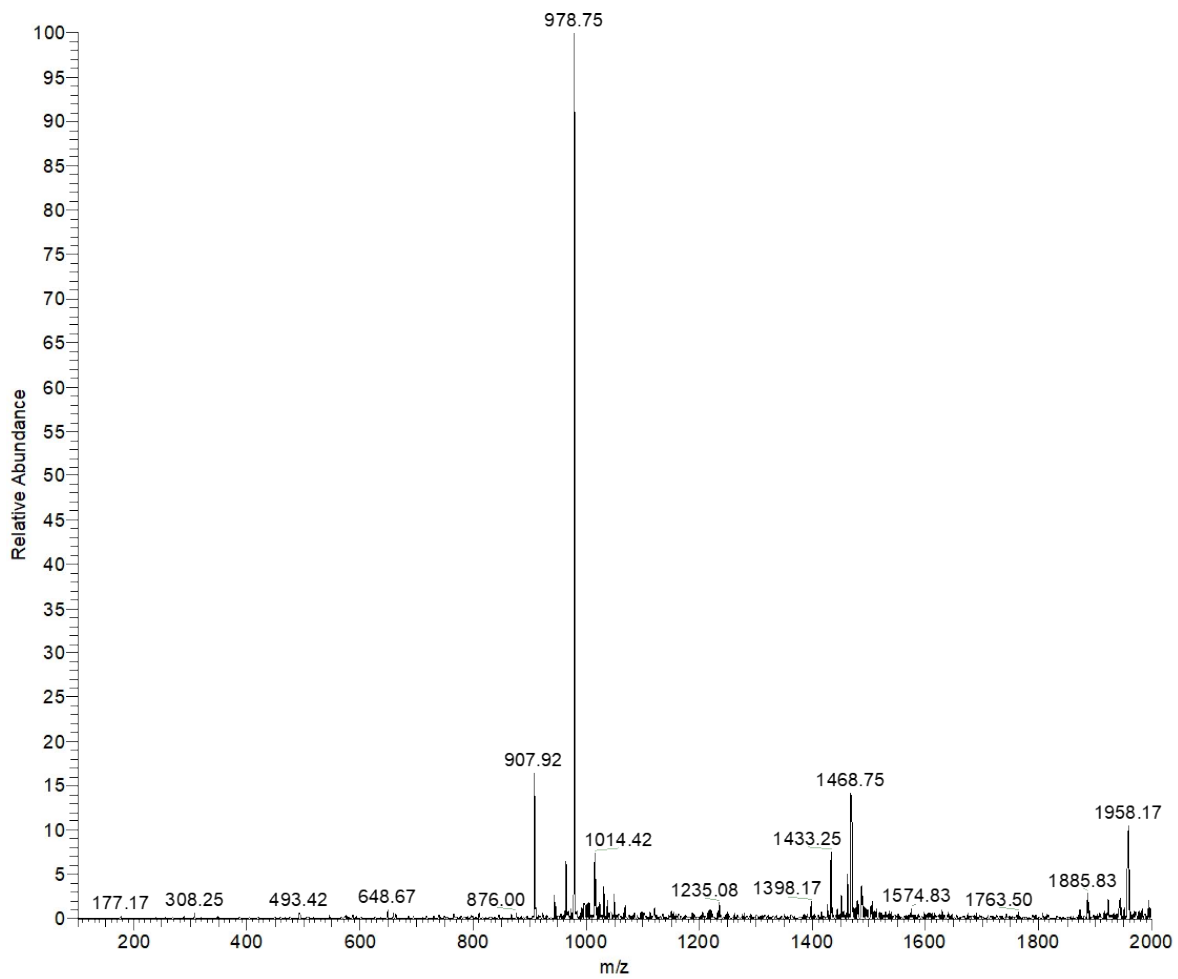

**Fig. S31** ESI-Mass spectrum of **TPA-1**.

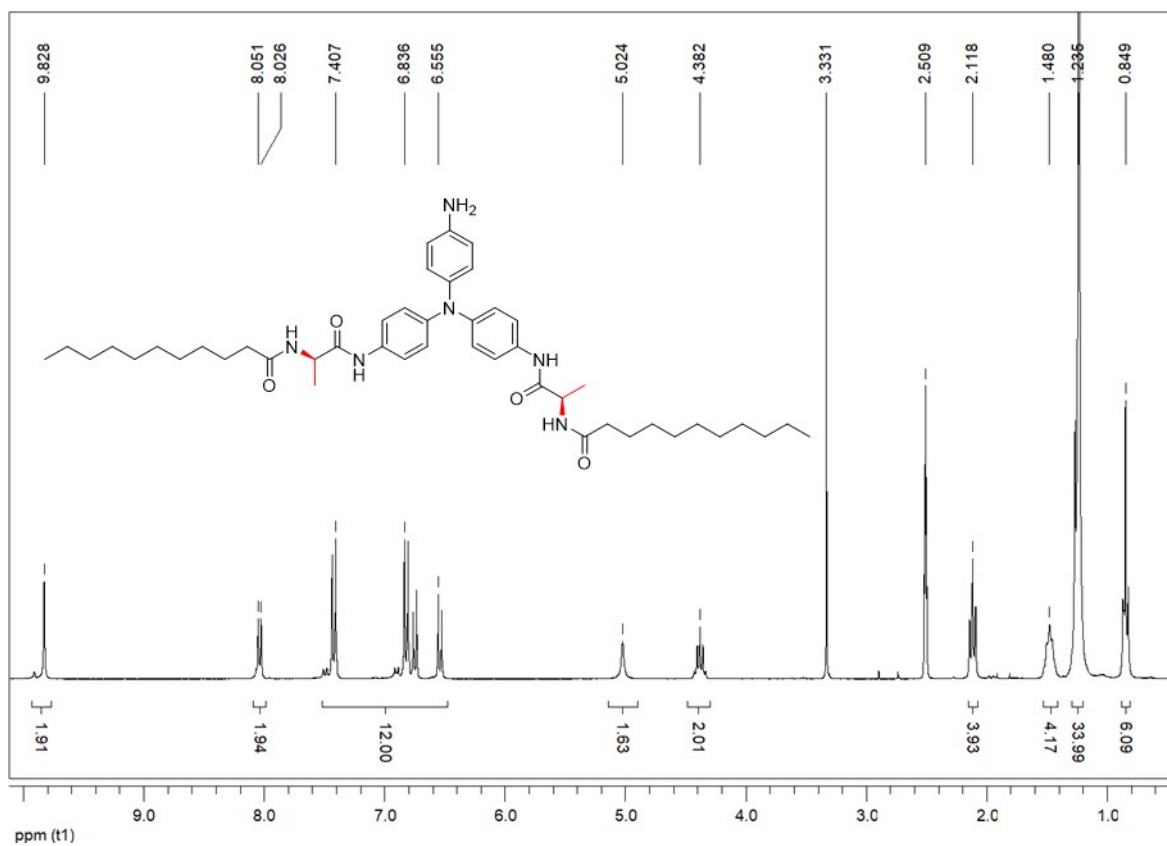

**Fig. S32** <sup>1</sup>H NMR spectrum (300 MHz) of C2 in DMSO-*d*<sub>6</sub> at 25 °C.

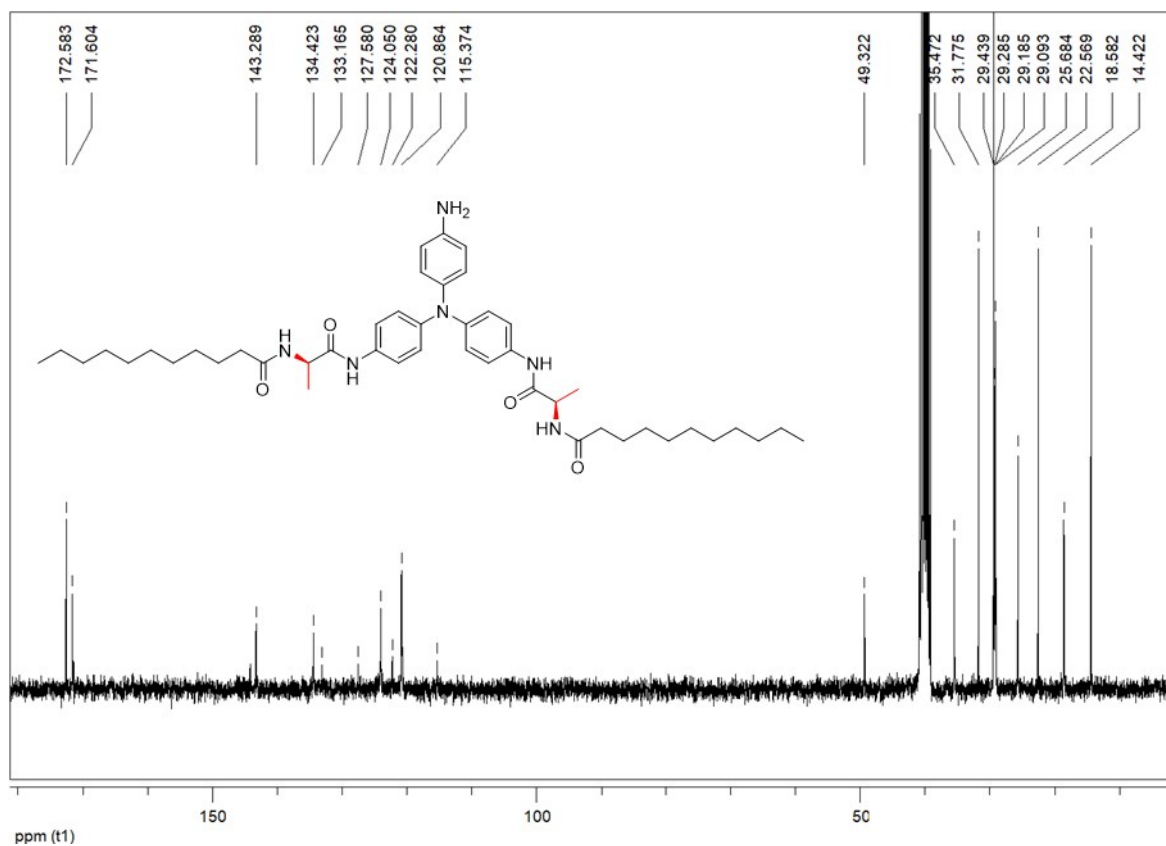

**Fig. S33** <sup>13</sup>C NMR spectrum (75 MHz) of C2 in DMSO-*d*<sub>6</sub> at 25 °C.

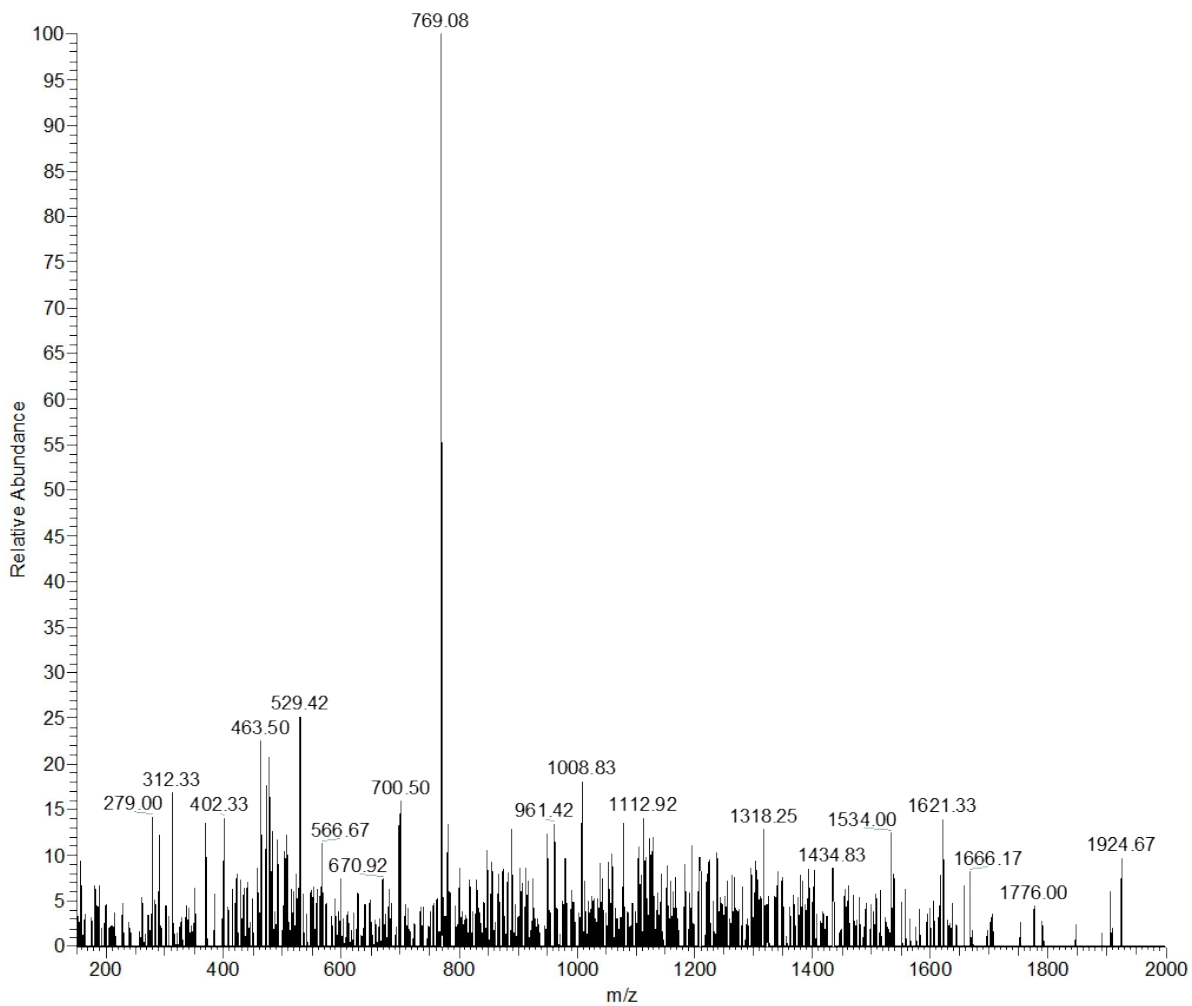

**Fig. S34** ESI-Mass spectrum of **C2**.



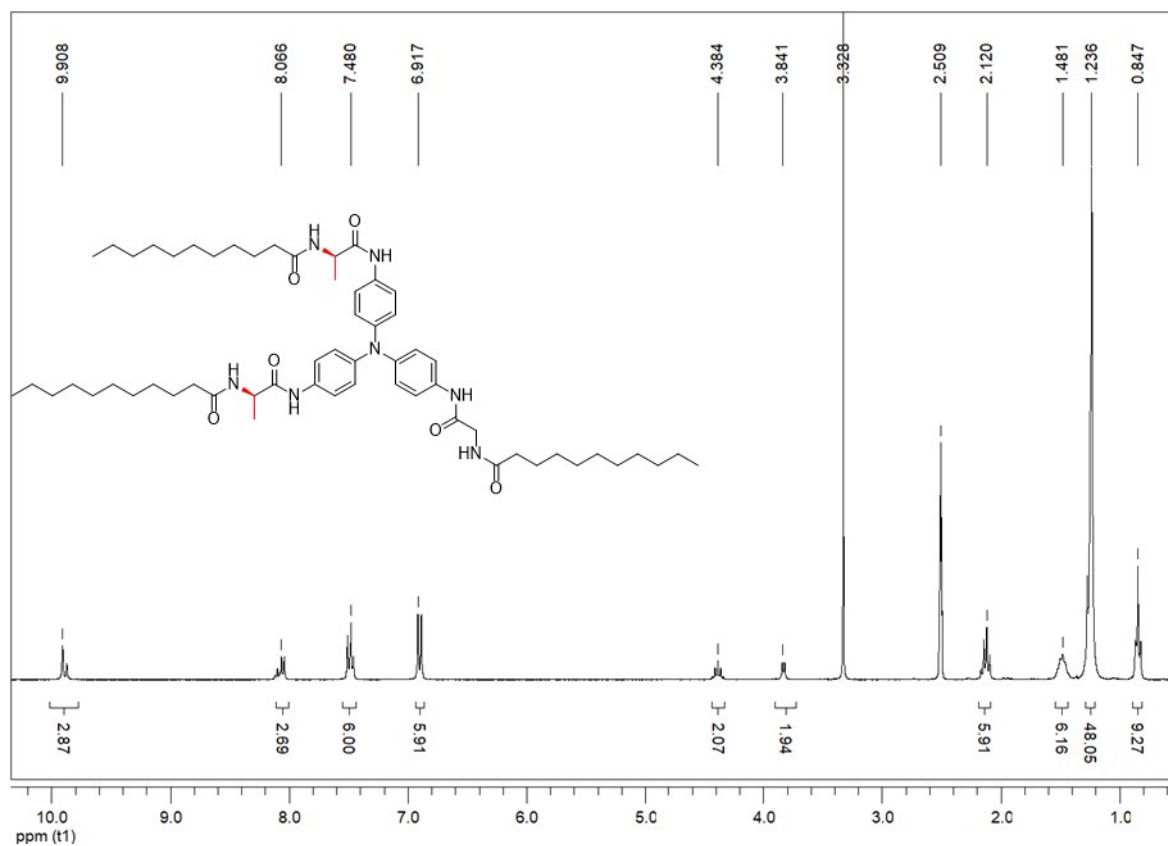

**Fig. S35** <sup>1</sup>H NMR spectrum (300 MHz) of TPA-2 in DMSO-*d*<sub>6</sub> at 25 °C.

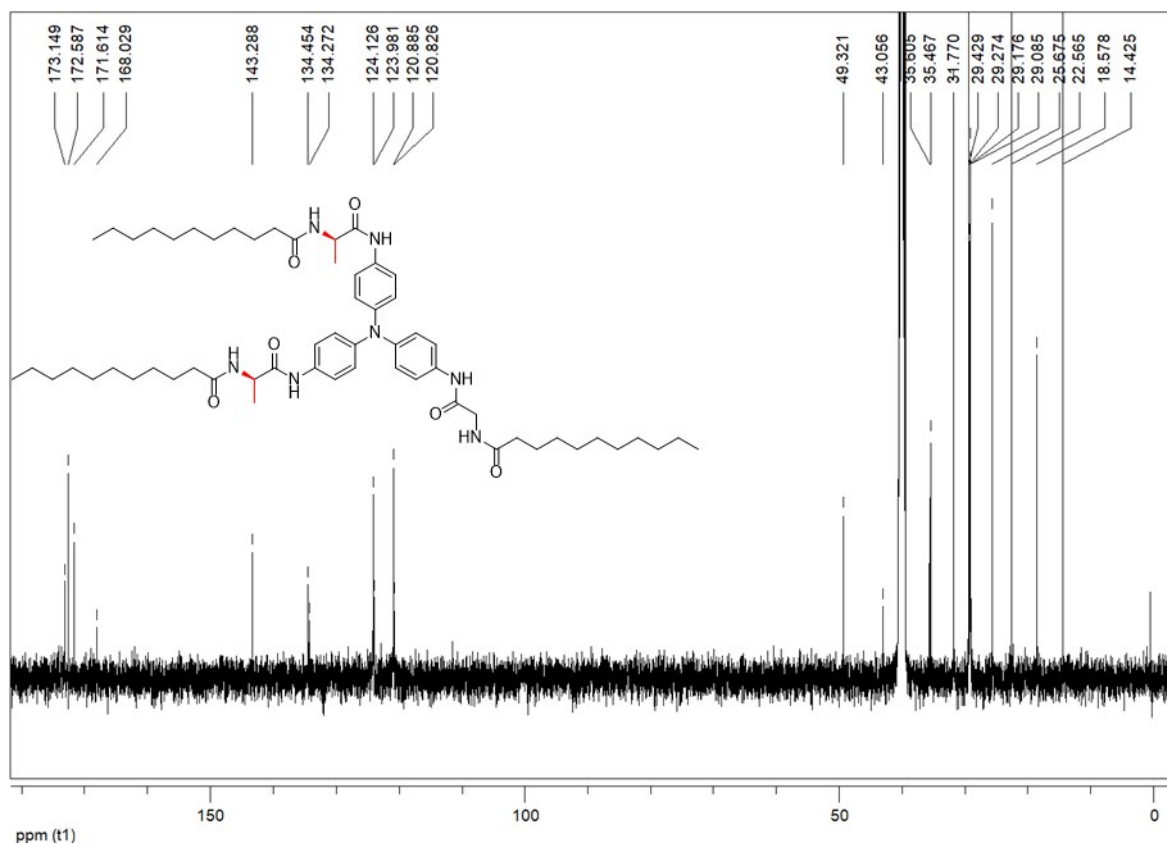

**Fig. S36**  $^{13}\text{C}$  NMR spectrum (75 MHz) of TPA-2 in  $\text{DMSO-}d_6$  at  $25\text{ }^\circ\text{C}$ .

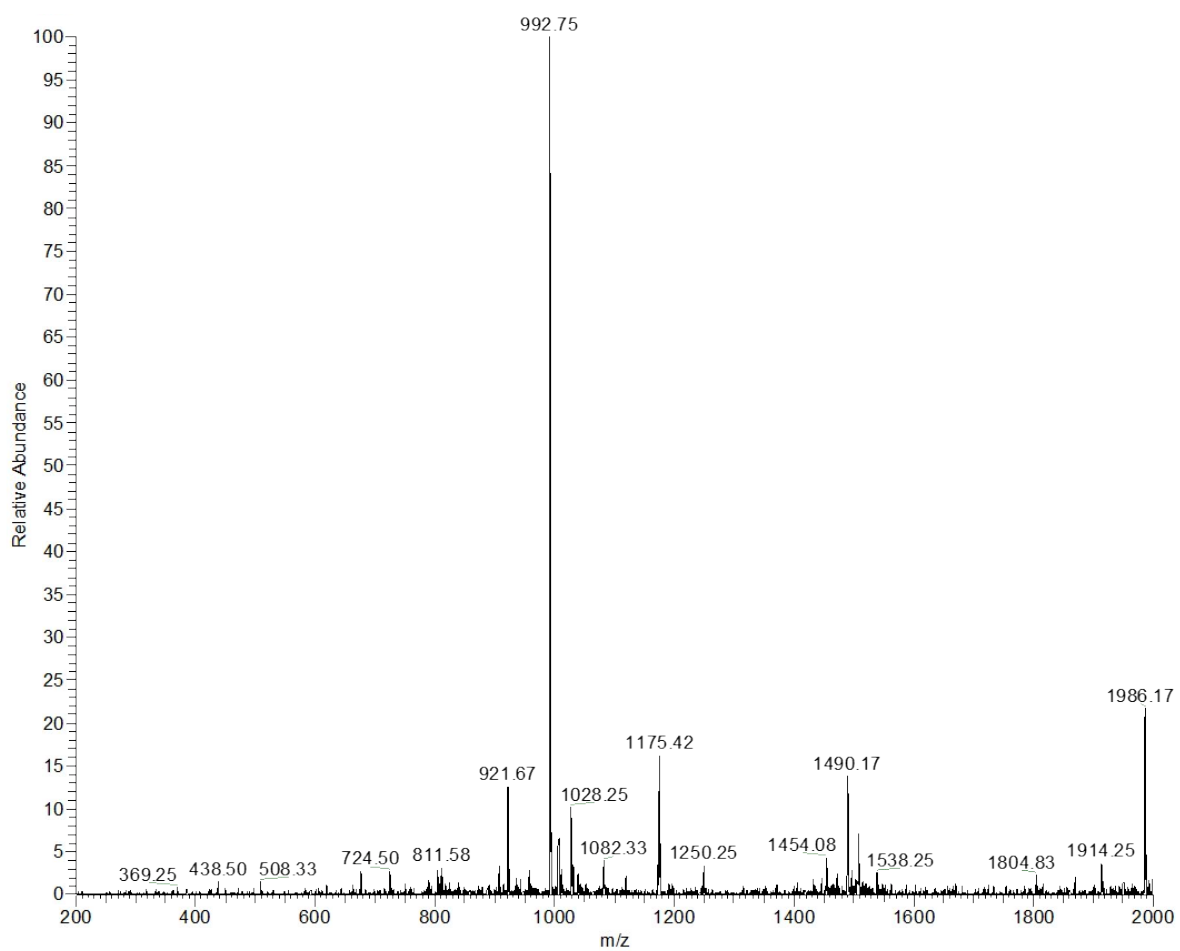

**Fig. S37** ESI-Mass spectrum of TPA-2.

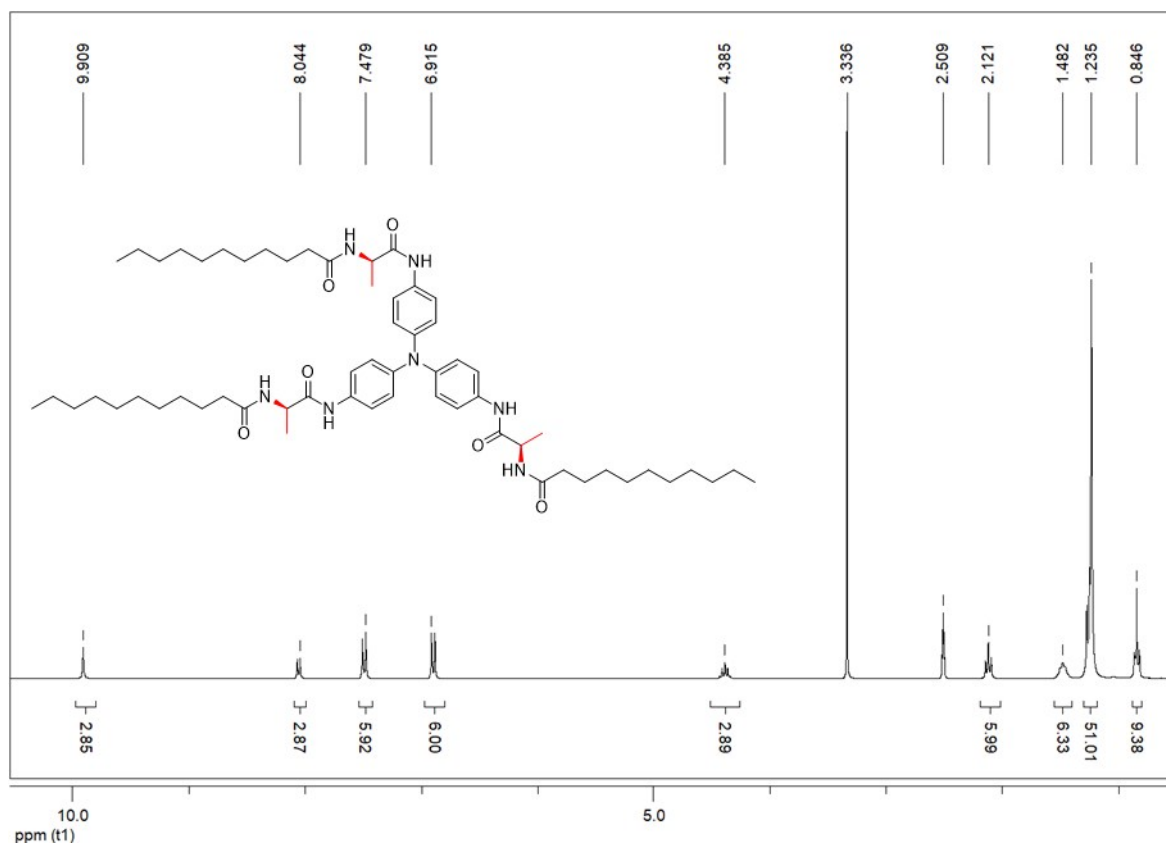

**Fig. S38** <sup>1</sup>H NMR spectrum (300 MHz) of TPA-3 in DMSO-*d*<sub>6</sub> at 25 °C.

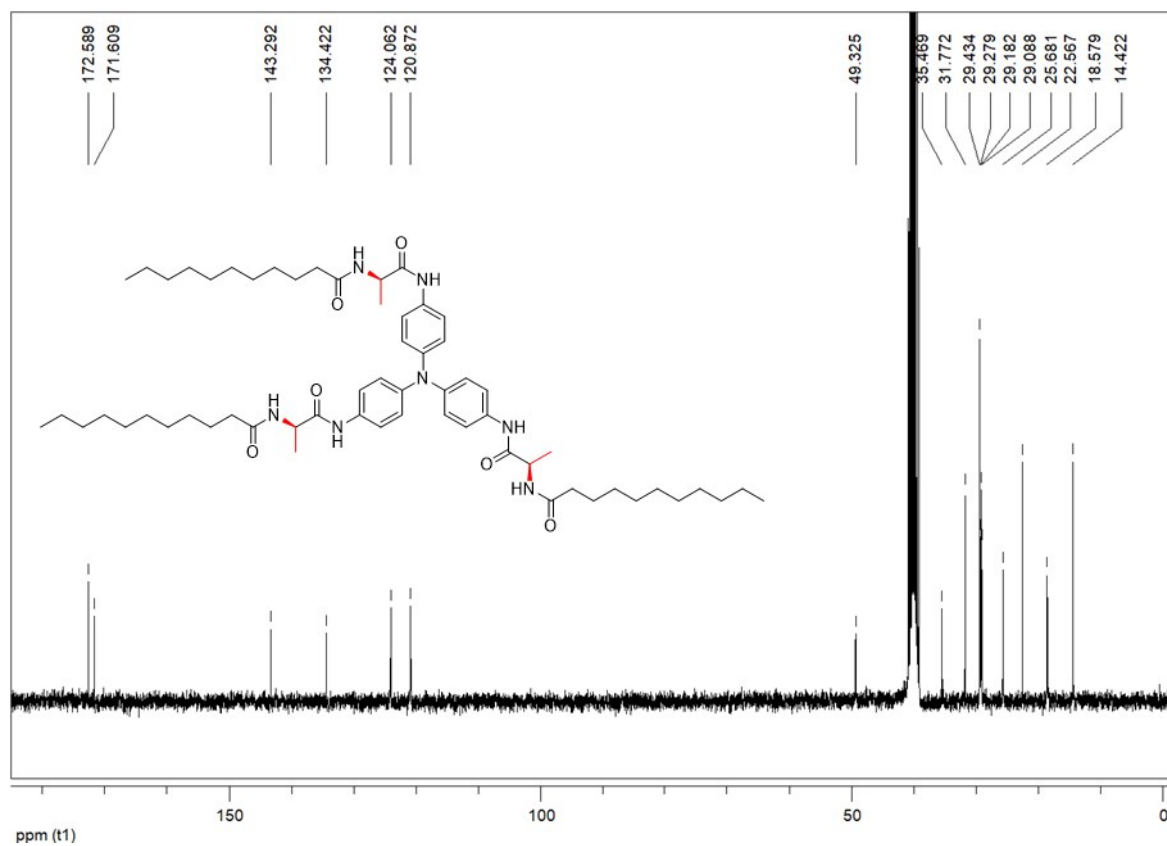

**Fig. S39** <sup>13</sup>C NMR spectrum (75 MHz) of TPA-3 in DMSO-*d*<sub>6</sub> at 25 °C.

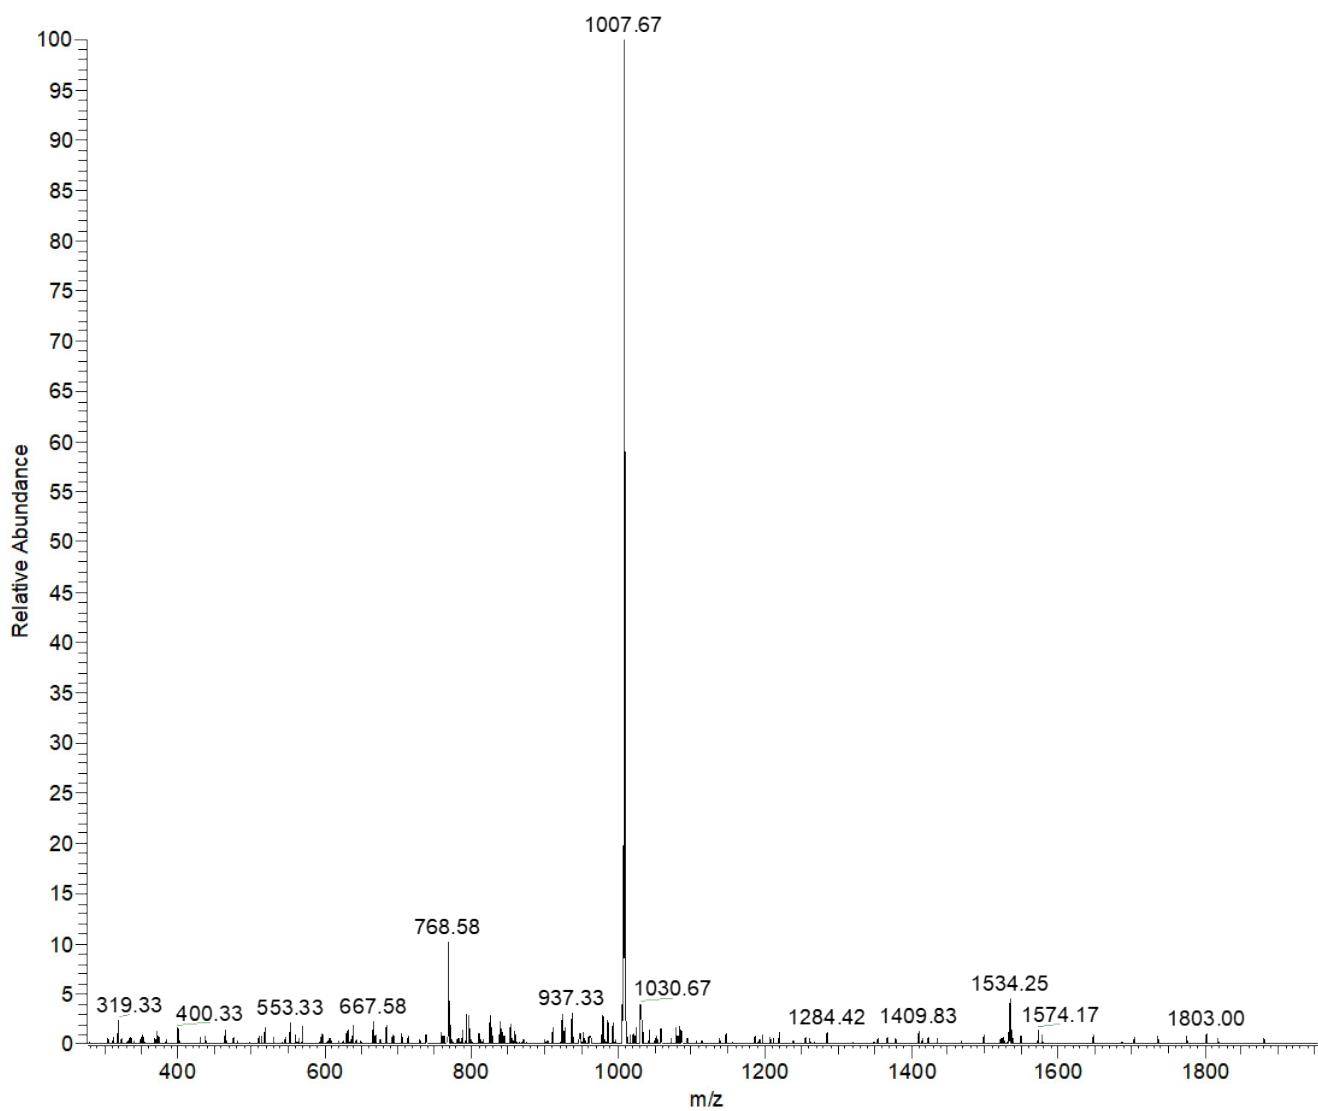

**Fig. S40** ESI-Mass spectrum of **TPA-3**.

## References

- S1 M.J. Frisch, G.W. Trucks, H.B. Schlegel, G.E. Scuseria, M.A. Robb, J.R. Cheeseman, G. Scalmani, V. Barone, B. Mennucci, G.A. Petersson, H. Nakatsuji, M. Caricato, X. Li, H.P. Hratchian, A.F. Izmaylov, J. Bloino, G. Zheng, J.L. Sonnenberg, M. Hada, M. Ehara, K. Toyota, R. Fukuda, J. Hasegawa, M. Ishida, T. Nakajima, Y. Honda, O. Kitao, H. Nakai, T. Vreven, J.J.A. Montgomery, J.E. Peralta, F. Ogliaro, M. Bearpark, J.J. Heyd, E. Brothers, K.N. Kudin, V.N. Staroverov, R. Kobayashi, J. Normand, K. Raghavachari, A. Rendell, J.C. Burant, S.S. Iyengar, J. Tomasi, M. Cossi, N. Rega, J.M. Millam, M. Klene, J.E. Knox, J.B. Cross, V. Bakken, C. Adamo, J. Jaramillo, R. Gomperts, R.E. Stratmann, O. Yazyev, A.J. Austin, R. Cammi, C. Pomelli, J.W. Ochterski, R.L. Martin, K. Morokuma, V.G. Zakrzewski, G.A. Voth, P. Salvador, J.J. Dannenberg, S. Dapprich, A.D. Daniels, O. Farkas, J.B. Foresman, J.V. Ortiz, J. Cioslowski, D.J. Fox, Gaussian 09, Gaussian Inc., Wallingford, CT, 2009.
- S2 M. M. J. Smulders, M. M. L. Nieuwenhuizen, T. F. A. de Greef, P. van der Schoot, A. P. H. J. Schenning and E. W. Meijer, *Chem.-Eur. J.*, 2010, **16**, 362-367.
- S3 P. A. Korevaar, S. J. George, A. J. Markvoort, M. M. J. Smulders, P. A. J. Hilbers, A. P. H. J. Schenning, T. F. A. De Greef and E. W. Meijer, *Nature*, 2012, **481**, 492.
- S4 M. Endo, T. Fukui, S. H. Jung, S. Yagai, M. Takeuchi and K. Sugiyasu, *J. Am. Chem. Soc.*, 2016, **138**, 14347-14353.
- S5 T. Fukui, S. Kawai, S. Fujinuma, Y. Matsushita, T. Yasuda, T. Sakurai, S. Seki, M. Takeuchi and K. Sugiyasu, *Nat. Chem.*, 2016, **9**, 493.
- S6 B. Adelizzi, I. A. W. Filot, A. R. A. Palmans and E. W. Meijer, *Chem. Eur. J.*, 2017, **23**, 6103-6110.
- S7 Ogi, S. Sugiyasu, K. Manna, S. Samitsu, S. Takeuchi, M. *Nat. Chem.* 2014, **6**, 188-195.
- S8 Wolffs, M. George, S. J. Tomović, Ž. Meskers, S. C. J. Schenning, A. P. H. J. Meijer, E. W., *Angew. Chem.-Int. Edit.* 2007, **46**, 8203-8205.
- S9 Buendía, J. Calbo, J. Ortí, E. Sánchez, L. *Small.* 2017, **13**, 1603880.
- S10 Tsuda, A. Alam, M. A. Harada, T. Yamaguchi, T. Ishii, N. Aida, T. *Angew. Chem.-Int. Edit.* 2007, **46**, 8198-8202.
- S11 Bhuniya, S. Park, S. M. Kim, B. H. *Org. Lett.* 2005, **7**, 1741-1744.
- S12 Wang, L. Cherian, C. Kugel Desmoulin, S. Mitchell-Ryan, S. Hou, Z. Matherly, L. H. Gangjee, A. *J. Med. Chem.* 2012, **55**, 1758-1770.
